# Supplementary material for: The influence of heteroatoms on the circularly polarized luminescence performance of [7]helicene derivatives: aromatic vs. non-aromatic five-membered rings
Source: Royal Society of Chemistry journal article supplement (doi:10.1039/d3cp05182j), 2024-01-01
Supplement: d3cp05182j1.pdf [file d3cp05182j1.pdf]

Supporting Information

**Influence of Heteroatoms on Circularly Polarized Luminescence  
Performance for [7]Helicene Derivatives: Non-aromatic vs.  
Aromatic Five-membered Rings**

**Yan Liu,<sup>a</sup> Zhiying Ma,<sup>\*a</sup> Hang Su,<sup>a</sup> Ran Wei,<sup>a</sup> Zhitao Shen<sup>\*b,c</sup> and Hua Wang<sup>a</sup>**

<sup>a</sup> *Engineering Research Center for Nanomaterials, Henan University, Kaifeng, 475004, China*

<sup>b</sup> *School of Future Technology, Henan University, Kaifeng 475004, China*

<sup>c</sup> *Institute of Quantum Materials and Physics, Henan Academy of Sciences, Zhengzhou 450046, China*

<sup>\*</sup> *Correspondence: mazy11@henu.edu.cn, shenzt@vip.henu.edu.cn*

## Contents

### I. Supplementary benchmarks

#### II. Supplementary Tables S1-S6

**Table S1.** Selected bond lengths and dihedral angles variations between  $S_0$  and  $S_1$  states for [7]helicene derivatives.

**Table S2.** Calculated emission energies ( $\Delta E_{\text{cal}}$ ), the experimental values ( $\Delta E_{\text{exp}}$ ), the deviation between calculation and experimental for [7]H and [7]H-C optimized at different density functional levels.

**Table S3.** Relaxation energies of low-frequency modes ( $\lambda_l$ ) and high-frequency modes ( $\lambda_h$ ) as well as the total reorganization energy ( $\lambda$ ) of [7]helicene and its derivations in solution phase.

**Table S4.** Selected computational excitation wavelength ( $\lambda$ ), oscillator strength ( $f$ ) and transition nature for the helicenes.

**Table S5.** Transition properties of [7]H-C optimized using different density functionals in conjunction with 6-311G(2d, p) basis set.

**Table S6.** Transition properties of [7]H-C optimized via B3LYP exchange-correlation functional in conjunction with different basis sets

#### III. Supplementary Figures S1-S12

**Figure S1.** Considerable bond lengths variations (marked as red) between  $S_0$  and  $S_1$  states for [7]helicene and its derivatives.

**Figure S2.** Centroid distances ( $d_c$ ) of the two terminal benzene rings in [7]helicene and its derivatives at  $S_0$  and  $S_1$  states.

**Figure S3.** Schematic representation of the adiabatic potential energy surfaces for  $S_0$  and  $S_1$ , Q is the nuclear configuration.

**Figure S4.** Calculated UV-vis spectra and oscillator strengths of the helicenes.

**Figure S5.** Calculated reorganization energy versus normal mode frequencies in solution phase of [7]H at  $S_0$  (top) and  $S_1$  (bottom) states.

**Figure S6.** Calculated reorganization energy versus normal mode frequencies in solution phase of carbon group [7]H derivations at  $S_0$  (top) and  $S_1$  (bottom) states.

**Figure S7.** Calculated reorganization energy versus normal mode frequencies in solution phase of oxygen group [7]H derivations at  $S_0$  (top) and  $S_1$  (bottom) states.

**Figure S8.** Selected normal modes of [7]H at  $S_0$  and  $S_1$  states with prominent relaxation energies.

**Figure S9.** Selected normal modes of [7]H-C, [7]H-Si, and [7]H-Ge at both  $S_0$  and  $S_1$  states with prominent relaxation energies.

**Figure S10.** Selected normal modes of [7]H-O, [7]H-S, and [7]H-Se at both  $S_0$  and  $S_1$  states with prominent relaxation energies.

**Figure S11.** Contour maps of the Dushinsky rotation matrix of [7]H-Si, [7]H-Ge, [7]H-S, and [7]H-Se.

**Figure S12.** Energy level diagrams and SOC coefficients ( $\xi$ ).

**Figure S13.** Energy profiles and transition states of [7]helicene and its derivatives. The barriers are in kcal/mol.



## I. Supplementary benchmarks

It is well known that B3LYP, PBE0<sup>1</sup>, M06-2X<sup>2</sup>,  $\omega$ B97XD<sup>3</sup> and CAM-B3LYP<sup>4</sup> are suitable exchange-correlation functionals for calculating excited states geometries of the aromatic compounds.<sup>5</sup> Combined with the fact that B3LYP are well-recognized and widely used for ground state structure calculation. Thus, on the basis of the optimized ground state structure using B3LYP, we selected the above five different functionals in conjunction with 6-311G (2d, p) basis set to optimize the S<sub>1</sub> state of [7]H and [7]H-C. As shown in the Table S2, the calculated emission energies of [7]H and [7]H-C both decrease with the increasing of HF exchange component, and the mean average error of the B3LYP is the smallest. On the other hand, this method reproduces both the photophysical and transition parameters at the expense of the computation of the emission energy, which appears to be the most suitable TDDFT method to estimate the excited state properties for the helicene systems.

To survey the dependance of  $g_{\text{lum}}$  on the functionals, the data of transition properties of [7]H-C are collectively given in the Table S5. Calculations show that the absolute values of each axis component of transition electronic dipole moment ( $\mu$ ) and transition magnetic dipole moment ( $m$ ), the angles between  $\mu$  and  $m$ , and the  $g_{\text{lum}}$  are slightly affected by the different functionals. In addition, the effect of basis sets on  $g_{\text{lum}}$  have also been considered. Table S6 collects the quantities  $\mu$ ,  $m$ , and the  $g_{\text{lum}}$  based on the optimized geometry by B3LYP in conjunction with two minimum acceptable size (6-31G(d) and 6-311G(d)), two medium-sized (6-311G(2d, p), def-TZVP), and more expensive (def2-TZVP<sup>6</sup>) basis sets. The data show that as the basis sets increases, the  $g_{\text{lum}}$  first increases and then levels off implying that the inexpensive B3LYP/6-311G(2d, p) level is adequate for exploring transition properties of the [7]helicene derivative and analogous compounds. Therefore, the B3LYP exchange-correlation functional in combination with the 6-311G(2d, p) basis set was used in our study.

## References

1. Adamo and V. Barone, *J. Chem. Phys.*, 1999, **110**, 6158-6170.
2. Y. Zhao and D. G. Truhlar, *Theor. Chem. Acc.*, 2008, **120**, 215-241.
3. J.-D. Chai and M. Head-Gordon, *Phys. Chem. Chem. Phys.*, 2008, **10**, 6615-6620.
4. T. Yanai, D. P. Tew and N. C. Handy, *Chem. Phys. Lett.*, 2004, **393**, 51-57.
5. J. Wang and B. Durbeej, *J. Comput. Chem.*, 2020, **41**, 1718-1729.
6. F. Weigend and R. Ahlrichs, *Phys. Chem. Chem. Phys.*, 2005, **7**, 3297-3305.

## II. Supplementary Tables S1-S6

**Table S1.** Selected bond lengths and dihedral angles variations between  $S_0$  and  $S_1$  states for [7]helicene derivatives.

| [7]H    |       |                   | [7]H-C | [7]H-Si | [7]H-Ge |                   | [7]H-O | [7]H-S | [7]H-Se |
|---------|-------|-------------------|--------|---------|---------|-------------------|--------|--------|---------|
| C1-C2   | 0.021 | C3-C4             | 0.029  | 0.037   | 0.035   | C3-C4             | 0.025  | 0.023  | 0.024   |
| C3-C4   | 0.029 | C4-C5             | -0.068 | -0.079  | -0.076  | C4-C5             | -0.048 | -0.065 | -0.065  |
| C5-C6   | 0.029 | C5-C6             | 0.029  | 0.037   | 0.035   | C5-C6             | 0.025  | 0.023  | 0.024   |
| C7-C8   | 0.023 | C7-C11            | -0.031 | -0.034  | -0.035  | C7-C11            | -0.024 | -0.033 | -0.034  |
| C21-C22 | 0.023 | C9-C10            | 0.034  | 0.032   | 0.034   | C9-C10            | 0.032  | 0.041  | 0.041   |
|         |       | C19-C20           | 0.034  | 0.032   | 0.034   | C19-C20           | 0.032  | 0.041  | 0.041   |
|         |       | C22-C26           | -0.031 | -0.034  | -0.035  | C22-C26           | -0.024 | -0.033 | -0.034  |
|         |       | C3-C19            |        | -0.021  | -0.022  | C3-C19            |        | -0.023 | -0.023  |
|         |       | C4-C22            |        | 0.029   | 0.031   | C6-C10            |        | -0.023 | -0.023  |
|         |       | C5-C7             |        | 0.029   | 0.031   | C4-C22            |        |        | 0.020   |
|         |       | C6-C10            |        | -0.021  | -0.022  | C5-C7             |        |        | 0.020   |
|         |       |                   |        |         |         | C3-X              |        |        | 0.021   |
|         |       |                   |        |         |         | C6-X              |        |        | 0.021   |
|         |       | C4-C5-<br>C6-C10  | 0.15   | -0.19   | -0.19   | C4-C5-<br>C6-C10  |        | 0.15   | 0.16    |
|         |       | C4-C5-<br>C7-C8   | -0.19  | 0.20    | 0.19    | C4-C5-<br>C7-C8   |        | -0.20  | -0.19   |
|         |       | C4-C5-<br>C7-C11  | -0.19  | 0.23    | 0.23    | C4-C5-<br>C7-C11  |        | -0.22  | -0.22   |
|         |       | C5-C4-<br>C3-C19  | 0.15   | -0.19   | -0.19   | C5-C4-<br>C22-C21 |        | -0.20  | -0.19   |
|         |       | C5-C4-<br>C22-C21 | -0.19  | 0.20    | 0.19    | C5-C4-<br>C22-C26 |        | -0.22  | -0.22   |
|         |       | C5-C4-<br>C22-C26 | -0.19  | 0.23    | 0.23    | C7-C5-<br>C4-C22  |        | 0.17   | 0.19    |
|         |       | C7-C5-<br>C4-C22  | 0.15   | -0.25   | -0.26   | C19-C3-<br>C4-C5  |        | 0.15   | 0.16    |
|         |       | C3-C4-<br>C5-C7   |        | -0.15   | -0.16   |                   |        |        |         |
|         |       | C6-C5-<br>C4-C22  |        | -0.15   | -0.16   |                   |        |        |         |
|         |       | H-C-<br>C3-C19    |        | 0.29    | 0.29    |                   |        |        |         |
|         |       | H-C-C6-C10        |        | 0.29    | 0.29    |                   |        |        |         |

**Table S2.** Calculated emission energies ( $\Delta E_{\text{cal}}$ ), the experimental values ( $\Delta E_{\text{exp}}$ ), the deviation between calculation and experimental for [7]H and [7]H-C optimized at different density functional levels.

| Method         | HF% <sup>a</sup> | [7]H                    |                         |                               | [7]H-C                  |                         |                               | MAE <sup>b</sup> |
|----------------|------------------|-------------------------|-------------------------|-------------------------------|-------------------------|-------------------------|-------------------------------|------------------|
|                |                  | $\Delta E_{\text{cal}}$ | $\Delta E_{\text{exp}}$ | $ \Delta E_{\text{cal-exp}} $ | $\Delta E_{\text{cal}}$ | $\Delta E_{\text{exp}}$ | $ \Delta E_{\text{cal-exp}} $ |                  |
| B3LYP          | 20%              | 447                     | 476                     | 29                            | 465                     | 417                     | 48                            | 39               |
| PBE0           | 25%              | 431                     |                         | 45                            | 453                     |                         | 36                            | 41               |
| M062X          | 54%              | 398                     |                         | 78                            | 429                     |                         | 12                            | 45               |
| CAM-B3LYP      | 19~65%           | 392                     |                         | 84                            | 430                     |                         | 13                            | 48               |
| $\omega$ B97XD | 22.2~100%        | 391                     |                         | 85                            | 426                     |                         | 9                             | 47               |

<sup>a</sup> Hartree-Fock exchange component. For range-separated functionals CAM-B3LYP and  $\omega$ B97XD, the values refer to the compositions of the short and long ranges of interelectronic interaction.

<sup>b</sup> MAE refers to mean average error.

**Table S3.** Relaxation energies of low-frequency modes ( $\lambda_l$ ) and high-frequency modes ( $\lambda_h$ ) as well as the total reorganization energy ( $\lambda$ ) of [7]helicene and its derivations in solution phase.

| Compounds | $\lambda_l$ | $\lambda_h$ | $\lambda$ |
|-----------|-------------|-------------|-----------|
| [7]H      | 84          | 189         | 284       |
| [7]H-C    | 292         | 275         | 610       |
| [7]H-Si   | 470         | 393         | 900       |
| [7]H-Ge   | 471         | 406         | 919       |
| [7]H-O    | 145         | 219         | 383       |
| [7]H-S    | 419         | 354         | 828       |
| [7]H-Se   | 443         | 377         | 878       |

**Table S4.** Selected computational excitation wavelength ( $\lambda$ ), oscillator strength ( $f$ ) and transition nature for the helicenes.

|                       |               | states                   | $\lambda/\text{eV}$   | $\lambda/\text{nm}$ | $f$    | Transition Contributions                                                                                                                      |                                                                              |
|-----------------------|---------------|--------------------------|-----------------------|---------------------|--------|-----------------------------------------------------------------------------------------------------------------------------------------------|------------------------------------------------------------------------------|
| <b>[7]H</b>           | Band I        | $S_0 \rightarrow S_1$    | 3.04                  | 407                 | 0.0003 | H $\rightarrow$ L (61%), H-1 $\rightarrow$ L+1 (38%)                                                                                          |                                                                              |
|                       |               | $S_0 \rightarrow S_2$    | 3.21                  | 386                 | 0.0197 | H-1 $\rightarrow$ L (93%), H $\rightarrow$ L+1 (6%)                                                                                           |                                                                              |
|                       |               | $S_0 \rightarrow S_3$    | 3.26                  | 380                 | 0.0549 | H $\rightarrow$ L+1 (85%), H-2 $\rightarrow$ L (9%)                                                                                           |                                                                              |
|                       | Band II       | $S_0 \rightarrow S_4$    | 3.50                  | 354                 | 0.0381 | H-2 $\rightarrow$ L (74%), H-1 $\rightarrow$ L+2 (12%), H-3 $\rightarrow$ L+1 (6%), H $\rightarrow$ L+1 (6%)                                  |                                                                              |
|                       |               | $S_0 \rightarrow S_5$    | 3.54                  | 350                 | 0.0124 | H-1 $\rightarrow$ L+1 (54%), H $\rightarrow$ L (33%), H-2 $\rightarrow$ L+1 (10%)                                                             |                                                                              |
|                       |               | $S_0 \rightarrow S_6$    | 3.63                  | 342                 | 0.0310 | H-2 $\rightarrow$ L+1 (73%), H $\rightarrow$ L+2 (10%), H-3 $\rightarrow$ L (7%)                                                              |                                                                              |
|                       | Band III      | $S_0 \rightarrow S_8$    | 3.93                  | 315                 | 0.0324 | H-3 $\rightarrow$ L+1 (53%), H $\rightarrow$ L+3 (31%), H-2 $\rightarrow$ L (10%)                                                             |                                                                              |
|                       |               | $S_0 \rightarrow S_9$    | 3.96                  | 313                 | 0.0383 | H-1 $\rightarrow$ L+2 (68%), H-3 $\rightarrow$ L+1 (22%)                                                                                      |                                                                              |
|                       |               | $S_0 \rightarrow S_{10}$ | 4.02                  | 308                 | 0.0694 | H-1 $\rightarrow$ L+3 (42%), H $\rightarrow$ L+2 (32%), H-3 $\rightarrow$ L (16%), H-2 $\rightarrow$ L+1 (6%)                                 |                                                                              |
|                       | Band IV       | $S_0 \rightarrow S_{16}$ | 4.53                  | 274                 | 0.3640 | H-1 $\rightarrow$ L+3 (37%), H-5 $\rightarrow$ L+1 (24%), H-3 $\rightarrow$ L (10%), H $\rightarrow$ L+2 (9%), H-3 $\rightarrow$ L+2 (8%)     |                                                                              |
|                       |               | $S_0 \rightarrow S_{17}$ | 4.70                  | 264                 | 0.1228 | H-5 $\rightarrow$ L (36%), H $\rightarrow$ L+4 (27%), H-1 $\rightarrow$ L+5 (9%)                                                              |                                                                              |
|                       |               | $S_0 \rightarrow S_{18}$ | 4.72                  | 263                 | 0.3539 | H-3 $\rightarrow$ L+2 (34%), H-5 $\rightarrow$ L+1 (23%), H-2 $\rightarrow$ L+3 (11%), H-1 $\rightarrow$ L+3 (8%), H-1 $\rightarrow$ L+4 (6%) |                                                                              |
|                       |               | $S_0 \rightarrow S_{20}$ | 4.84                  | 256                 | 0.1151 | H $\rightarrow$ L+4 (64%), H-1 $\rightarrow$ L+5 (11%), H-3 $\rightarrow$ L+3 (10%), H-5 $\rightarrow$ L (6%)                                 |                                                                              |
|                       | <b>[7]H-C</b> | Band I                   | $S_0 \rightarrow S_1$ | 3.20                | 387    | 0.1581                                                                                                                                        | H $\rightarrow$ L (89%), H $\rightarrow$ L+1 (7%)                            |
|                       |               | Band II                  | $S_0 \rightarrow S_3$ | 3.55                | 350    | 0.0359                                                                                                                                        | H $\rightarrow$ L+1 (53%), H-2 $\rightarrow$ L (37%), H $\rightarrow$ L (7%) |
|                       |               |                          | $S_0 \rightarrow S_4$ | 3.76                | 330    | 0.0362                                                                                                                                        | H-2 $\rightarrow$ L (60%), H $\rightarrow$ L+1 (36%)                         |
| $S_0 \rightarrow S_5$ |               |                          | 3.85                  | 322                 | 0.0856 | H $\rightarrow$ L+2 (64%), H-1 $\rightarrow$ L (15%), H-3 $\rightarrow$ L (6%), H $\rightarrow$ L+3 (5%)                                      |                                                                              |
| Band III              |               | $S_0 \rightarrow S_6$    | 3.98                  | 312                 | 0.0184 | H-3 $\rightarrow$ L (56%), H-1 $\rightarrow$ L+1 (26%), H-2 $\rightarrow$ L+2 (6%), H $\rightarrow$ L+2 (5%)                                  |                                                                              |
|                       |               | $S_0 \rightarrow S_8$    | 4.15                  | 298                 | 0.0534 | H-1 $\rightarrow$ L+2 (86%), H-4 $\rightarrow$ L                                                                                              |                                                                              |

|         |          |                          |      |     |        |                                                                                                                                                                         |
|---------|----------|--------------------------|------|-----|--------|-------------------------------------------------------------------------------------------------------------------------------------------------------------------------|
|         |          |                          |      |     |        | (6%)                                                                                                                                                                    |
|         | Band IV  | $S_0 \rightarrow S_{14}$ | 4.60 | 270 | 0.1695 | H-2 $\rightarrow$ L+2 (34%), H $\rightarrow$ L+3 (16%), H-2 $\rightarrow$ L+3 (10%), H-1 $\rightarrow$ L+1 (10%), H-5 $\rightarrow$ L (9%), H-3 $\rightarrow$ L (8%)    |
|         |          | $S_0 \rightarrow S_{16}$ | 4.80 | 258 | 0.0831 | H-1 $\rightarrow$ L+3 (36%), H-3 $\rightarrow$ L+2 (32%), H-4 $\rightarrow$ L+1 (16%)                                                                                   |
|         | Band V   | $S_0 \rightarrow S_{18}$ | 5.01 | 248 | 0.0694 | H $\rightarrow$ L+5 (60%), H-4 $\rightarrow$ L+2 (19%), H-2 $\rightarrow$ L+3 (6%)                                                                                      |
|         |          | $S_0 \rightarrow S_{20}$ | 5.05 | 246 | 0.0391 | H-4 $\rightarrow$ L+1 (53%), H-3 $\rightarrow$ L+3 (12%), H-2 $\rightarrow$ L+4 (10%), H-1 $\rightarrow$ L+3 (8%), H $\rightarrow$ L+6 (7%)                             |
|         |          | $S_0 \rightarrow S_{21}$ | 5.11 | 242 | 0.1846 | H-2 $\rightarrow$ L+3 (39%), H-1 $\rightarrow$ L+4 (26%), H-4 $\rightarrow$ L+2 (24%)                                                                                   |
|         |          | $S_0 \rightarrow S_{22}$ | 5.20 | 238 | 0.4172 | H-4 $\rightarrow$ L+2 (22%), H-5 $\rightarrow$ L+1 (19%), H-2 $\rightarrow$ L+3 (12%), H $\rightarrow$ L+5 (11%), H-5 $\rightarrow$ L (11%), H-3 $\rightarrow$ L+1 (8%) |
| [7]H-Si | Band I   | $S_0 \rightarrow S_1$    | 3.11 | 399 | 0.0980 | H $\rightarrow$ L (92%)                                                                                                                                                 |
|         | Band II  | $S_0 \rightarrow S_4$    | 3.49 | 355 | 0.0477 | H $\rightarrow$ L+1 (55%), H-1 $\rightarrow$ L (40%)                                                                                                                    |
|         | Band III | $S_0 \rightarrow S_5$    | 3.78 | 328 | 0.0188 | H $\rightarrow$ L+2 (43%), H-3 $\rightarrow$ L (37%), H-2 $\rightarrow$ L (10%)                                                                                         |
|         |          | $S_0 \rightarrow S_6$    | 3.82 | 325 | 0.0293 | H-3 $\rightarrow$ L (48%), H $\rightarrow$ L+2 (31%), H-2 $\rightarrow$ L+1 (5%)                                                                                        |
|         |          | $S_0 \rightarrow S_7$    | 3.85 | 322 | 0.0889 | H-1 $\rightarrow$ L+1 (94%)                                                                                                                                             |
|         | Band IV  | $S_0 \rightarrow S_{13}$ | 4.46 | 278 | 0.0452 | H-3 $\rightarrow$ L+2 (66%), H-2 $\rightarrow$ L+3 (11%), H-2 $\rightarrow$ L+2 (8%), H-4 $\rightarrow$ L (8%)                                                          |
|         |          | $S_0 \rightarrow S_{14}$ | 4.48 | 277 | 0.1756 | H-5 $\rightarrow$ L (27%), H $\rightarrow$ L+3 (25%), H-1 $\rightarrow$ L+2 (21%), H-2 $\rightarrow$ L+1 (7%), H-3 $\rightarrow$ L (7%), H-1 $\rightarrow$ L+3 (6%)     |
|         | Band V   | $S_0 \rightarrow S_{18}$ | 4.87 | 254 | 0.5678 | H-1 $\rightarrow$ L+3 (46%), H-5 $\rightarrow$ L (10%), H-5 $\rightarrow$ L+1 (7%), H-3 $\rightarrow$ L+1 (7%), H $\rightarrow$ L+3 (7%)                                |
|         |          | $S_0 \rightarrow S_{19}$ | 4.96 | 250 | 0.0787 | H-2 $\rightarrow$ L+3 (52%), H-1 $\rightarrow$ L+4 (10%), H-4 $\rightarrow$ L+1 (9%), H-5 $\rightarrow$ L+2 (8%), H-3 $\rightarrow$ L+2 (5%)                            |
|         |          | $S_0 \rightarrow S_{23}$ | 5.12 | 242 | 0.1302 | H-4 $\rightarrow$ L+2 (33%), H $\rightarrow$ L+5 (31%), H-2 $\rightarrow$ L+4 (10%), H-5 $\rightarrow$ L (7%)                                                           |
| [7]H-Ge | Band I   | $S_0 \rightarrow S_1$    | 3.11 | 398 | 0.0959 | H $\rightarrow$ L (92%)                                                                                                                                                 |
|         | Band II  | $S_0 \rightarrow S_4$    | 3.55 | 350 | 0.0439 | H $\rightarrow$ L+1 (68%), H-1 $\rightarrow$ L                                                                                                                          |



|               |          |                          |      |     |        |                                                                                                                                                                        |
|---------------|----------|--------------------------|------|-----|--------|------------------------------------------------------------------------------------------------------------------------------------------------------------------------|
|               |          |                          |      |     |        | (25%)                                                                                                                                                                  |
|               | Band III | $S_0 \rightarrow S_6$    | 3.83 | 324 | 0.0329 | H-3 $\rightarrow$ L (41%), H $\rightarrow$ L+2 (38%), H-2 $\rightarrow$ L (6%)                                                                                         |
|               |          | $S_0 \rightarrow S_7$    | 3.89 | 319 | 0.0899 | H-1 $\rightarrow$ L+1 (94%)                                                                                                                                            |
|               | Band IV  | $S_0 \rightarrow S_{13}$ | 4.45 | 279 | 0.0437 | H-3 $\rightarrow$ L+2 (65%), H-2 $\rightarrow$ L+3 (15%), H-2 $\rightarrow$ L+2 (8%), H-4 $\rightarrow$ L (7%)                                                         |
|               |          | $S_0 \rightarrow S_{14}$ | 4.48 | 277 | 0.1661 | H-5 $\rightarrow$ L (37%), H $\rightarrow$ L+3 (21%), H-1 $\rightarrow$ L+2 (18%), H-2 $\rightarrow$ L+1 (8%), H-3 $\rightarrow$ L (6%)                                |
|               | Band V   | $S_0 \rightarrow S_{18}$ | 4.84 | 256 | 0.5443 | H-1 $\rightarrow$ L+3 (45%), H-5 $\rightarrow$ L (8%), H $\rightarrow$ L+3 (8%), H-3 $\rightarrow$ L+1 (7%), H-5 $\rightarrow$ L+1 (5%)                                |
|               |          | $S_0 \rightarrow S_{19}$ | 4.95 | 251 | 0.0639 | H-2 $\rightarrow$ L+3 (41%), H-4 $\rightarrow$ L+1 (14%), H-1 $\rightarrow$ L+4 (10%), H-5 $\rightarrow$ L+2 (9%), H $\rightarrow$ L+4 (7%)                            |
|               |          | $S_0 \rightarrow S_{25}$ | 5.18 | 239 | 0.1535 | H-6 $\rightarrow$ L (53%), H-8 $\rightarrow$ L (21%)                                                                                                                   |
| <b>[7]H-O</b> | Band I   | $S_0 \rightarrow S_1$    | 3.33 | 373 | 0.1448 | H $\rightarrow$ L (89%)                                                                                                                                                |
|               |          | $S_0 \rightarrow S_2$    | 3.35 | 370 | 0.0141 | H-1 $\rightarrow$ L (81%), H $\rightarrow$ L+1 (15%)                                                                                                                   |
|               | Band II  | $S_0 \rightarrow S_4$    | 3.90 | 318 | 0.0946 | H $\rightarrow$ L+1 (72%), H-1 $\rightarrow$ L (12%), H-3 $\rightarrow$ L (10%)                                                                                        |
|               |          | $S_0 \rightarrow S_5$    | 3.94 | 315 | 0.1928 | H-1 $\rightarrow$ L+1 (92%)                                                                                                                                            |
|               | Band III | $S_0 \rightarrow S_{13}$ | 4.63 | 268 | 0.1096 | H-2 $\rightarrow$ L+1 (31%), H-2 $\rightarrow$ L+3 (19%), H $\rightarrow$ L+3 (14%), H-1 $\rightarrow$ L+2 (14%), H-3 $\rightarrow$ L (7%), H-3 $\rightarrow$ L+2 (7%) |
|               |          | $S_0 \rightarrow S_{15}$ | 4.76 | 260 | 0.0923 | H-5 $\rightarrow$ L (39%), H-3 $\rightarrow$ L+1 (15%), H-4 $\rightarrow$ L+1 (13%), H-1 $\rightarrow$ L+3 (11%), H-2 $\rightarrow$ L+2 (6%)                           |
|               |          | $S_0 \rightarrow S_{16}$ | 4.80 | 258 | 0.0786 | H-3 $\rightarrow$ L+2 (54%), H-2 $\rightarrow$ L+3 (11%), H $\rightarrow$ L+3 (9%), H-3 $\rightarrow$ L (7%)                                                           |
|               | Band IV  | $S_0 \rightarrow S_{22}$ | 5.21 | 238 | 0.4650 | H-2 $\rightarrow$ L+3 (25%), H-3 $\rightarrow$ L+2 (16%), H-5 $\rightarrow$ L+1 (16%), H-4 $\rightarrow$ L+2 (14%), H $\rightarrow$ L+4 (8%)                           |
| <b>[7]H-S</b> | Band I   | $S_0 \rightarrow S_1$    | 3.16 | 392 | 0.0233 | H-1 $\rightarrow$ L (89%), H $\rightarrow$ L+1 (8%)                                                                                                                    |
|               |          | $S_0 \rightarrow S_2$    | 3.19 | 389 | 0.1015 | H $\rightarrow$ L (91%)                                                                                                                                                |
|               | Band II  | $S_0 \rightarrow S_4$    | 3.79 | 327 | 0.1223 | H-1 $\rightarrow$ L+1 (93%)                                                                                                                                            |
|               |          | $S_0 \rightarrow S_5$    | 3.84 | 323 | 0.0421 | H $\rightarrow$ L+1 (78%), H-3 $\rightarrow$ L (10%), H-1 $\rightarrow$ L (5%)                                                                                         |
|               |          | $S_0 \rightarrow S_8$    | 4.03 | 308 | 0.0877 | H-1 $\rightarrow$ L+2 (35%), H-3 $\rightarrow$ L (24%), H-2 $\rightarrow$ L+1 (17%), H $\rightarrow$ L+3 (10%), H $\rightarrow$ L+1 (7%)                               |

|                          |          |                          |                       |                                                  |        |                                                                                                                                                                                                                                 |                           |
|--------------------------|----------|--------------------------|-----------------------|--------------------------------------------------|--------|---------------------------------------------------------------------------------------------------------------------------------------------------------------------------------------------------------------------------------|---------------------------|
|                          | Band III | $S_0 \rightarrow S_{13}$ | 4.48                  | 277                                              | 0.1259 | H-2 $\rightarrow$ L+1 (20%), H-3 $\rightarrow$ L+2 (19%), H-2 $\rightarrow$ L+3 (19%), H $\rightarrow$ L+3 (18%), H-1 $\rightarrow$ L+4 (7%), H-1 $\rightarrow$ L+2 (6%), H-5 $\rightarrow$ L+1 (5%)                            |                           |
|                          |          | $S_0 \rightarrow S_{15}$ | 4.62                  | 269                                              | 0.0962 | H-3 $\rightarrow$ L+1 (32%), H-4 $\rightarrow$ L+1 (24%), H-1 $\rightarrow$ L+3 (21%), H-5 $\rightarrow$ L (11%)                                                                                                                |                           |
|                          |          | $S_0 \rightarrow S_{16}$ | 4.64                  | 267                                              | 0.1057 | H-3 $\rightarrow$ L+2 (50%), H $\rightarrow$ L+3 (21%), H-2 $\rightarrow$ L+3 (7%)                                                                                                                                              |                           |
|                          | Band IV  | $S_0 \rightarrow S_{19}$ | 4.92                  | 252                                              | 0.0868 | H-4 $\rightarrow$ L+1 (61%), H-3 $\rightarrow$ L+1 (7%), H-2 $\rightarrow$ L+4 (6%)                                                                                                                                             |                           |
|                          |          | $S_0 \rightarrow S_{20}$ | 4.97                  | 249                                              | 0.1561 | H-4 $\rightarrow$ L+2 (53%), H $\rightarrow$ L+5 (16%), H-2 $\rightarrow$ L+3 (8%), H-1 $\rightarrow$ L+4 (7%)                                                                                                                  |                           |
|                          |          | $S_0 \rightarrow S_{21}$ | 5.04                  | 246                                              | 0.1609 | H-1 $\rightarrow$ L+6 (35%), H-2 $\rightarrow$ L+3 (24%), H-5 $\rightarrow$ L+1 (17%), H-1 $\rightarrow$ L+7 (7%)                                                                                                               |                           |
|                          |          | $S_0 \rightarrow S_{23}$ | 5.07                  | 245                                              | 0.3470 | H-5 $\rightarrow$ L+1 (22%), H-3 $\rightarrow$ L+2 (12%), H-4 $\rightarrow$ L+2 (12%), H $\rightarrow$ L+5 (8%), H-2 $\rightarrow$ L+3 (8%), H-1 $\rightarrow$ L+4 (8%), H-1 $\rightarrow$ L+6 (7%), H-5 $\rightarrow$ L+3 (5%) |                           |
|                          | [7]H-Se  | Band I                   | $S_0 \rightarrow S_1$ | 3.06                                             | 405    | 0.0271                                                                                                                                                                                                                          | H $\rightarrow$ L (92%)   |
|                          |          |                          | $S_0 \rightarrow S_2$ | 3.13                                             | 396    | 0.1020                                                                                                                                                                                                                          | H-1 $\rightarrow$ L (93%) |
|                          |          | Band II                  | $S_0 \rightarrow S_4$ | 3.75                                             | 331    | 0.0794                                                                                                                                                                                                                          | H $\rightarrow$ L+1 (93%) |
| $S_0 \rightarrow S_8$    |          |                          | 3.94                  | 315                                              | 0.0921 | H $\rightarrow$ L+2 (42%), H-3 $\rightarrow$ L (20%), H-2 $\rightarrow$ L+1 (17%), H-1 $\rightarrow$ L+1 (8%), H-1 $\rightarrow$ L+3 (6%)                                                                                       |                           |
| Band III                 |          | $S_0 \rightarrow S_{16}$ | 4.47                  | 277                                              | 0.0857 | H-3 $\rightarrow$ L+2 (33%), H-2 $\rightarrow$ L+3 (32%), H-2 $\rightarrow$ L+1 (10%), H-1 $\rightarrow$ L+3 (6%), H $\rightarrow$ L+4 (6%)                                                                                     |                           |
|                          |          | $S_0 \rightarrow S_{17}$ | 4.59                  | 270                                              | 0.1854 | H-1 $\rightarrow$ L+3 (35%), H-3 $\rightarrow$ L+2 (34%), H-2 $\rightarrow$ L+1 (7%), H $\rightarrow$ L+2 (6%), H-3 $\rightarrow$ L (5%)                                                                                        |                           |
|                          |          | $S_0 \rightarrow S_{18}$ | 4.59                  | 270                                              | 0.0944 | H-3 $\rightarrow$ L+1 (42%), H-4 $\rightarrow$ L+1 (21%), H $\rightarrow$ L+3 (18%)                                                                                                                                             |                           |
|                          |          | $S_0 \rightarrow S_{19}$ | 4.84                  | 256                                              | 0.0639 | H-4 $\rightarrow$ L+1 (61%), H-2 $\rightarrow$ L+4 (15%), H-3 $\rightarrow$ L+1 (6%)                                                                                                                                            |                           |
|                          |          | $S_0 \rightarrow S_{20}$ | 4.85                  | 256                                              | 0.1974 | H-4 $\rightarrow$ L+2 (52%), H-2 $\rightarrow$ L+3 (25%), H-3 $\rightarrow$ L+2 (7%)                                                                                                                                            |                           |
|                          |          | $S_0 \rightarrow S_{21}$ | 4.93                  | 251                                              | 0.2052 | H-4 $\rightarrow$ L+2 (29%), H-2 $\rightarrow$ L+3 (28%), H $\rightarrow$ L+5 (13%), H-3 $\rightarrow$ L+2 (10%), H-6 $\rightarrow$ L (6%)                                                                                      |                           |
| $S_0 \rightarrow S_{29}$ | 5.26     | 236                      | 0.2799                | H-6 $\rightarrow$ L (61%), H-5 $\rightarrow$ L+1 |        |                                                                                                                                                                                                                                 |                           |

|  |  |  |  |  |  |                      |
|--|--|--|--|--|--|----------------------|
|  |  |  |  |  |  | (9%), H-1 → L+6 (6%) |
|--|--|--|--|--|--|----------------------|

**Table S5.** Transition properties of [7]H-C optimized using different density functionals in conjunction with 6-311G(2d, p) basis set.

|                                                                       | B3LYP     | PBE0      | M06-2X    | CAM-B3LYP | $\omega$ B97XD |
|-----------------------------------------------------------------------|-----------|-----------|-----------|-----------|----------------|
| HF exchange                                                           | 20%       | 25%       | 54%       | 19~65%    | 22.2~100%      |
| <b><math>\mu</math> and <math>m</math> in atom units <sup>a</sup></b> |           |           |           |           |                |
| $\mu_x$                                                               | -1.5610   | -1.5720   | -1.6226   | -1.6507   | -1.6454        |
| $\mu_y$                                                               | -0.0001   | -0.0003   | 0.0000    | 0.0000    | 0.0001         |
| $\mu_z$                                                               | -0.3864   | -0.3833   | 0.3652    | -0.3514   | -0.3447        |
| $ \mu $                                                               | 1.6081    | 1.6181    | 1.6632    | 1.6877    | 1.6811         |
| $m_x$                                                                 | -0.1022   | -0.1305   | -0.1356   | -0.1568   | -0.1362        |
| $m_y$                                                                 | 0.0000    | 0.0000    | 0.0000    | 0.0000    | 0.0000         |
| $m_z$                                                                 | -1.9410   | -2.0108   | 2.1513    | -2.0302   | -2.0352        |
| $ m $                                                                 | 1.9437    | 2.0150    | 2.1556    | 2.0362    | 2.0398         |
| <b>Transition parameters in CGS units</b>                             |           |           |           |           |                |
| $\mu_x^b$                                                             | -396.7594 | -399.5552 | -412.4162 | -419.5584 | -418.2113      |
| $\mu_y^b$                                                             | -0.0254   | -0.0763   | 0.0000    | 0.0000    | 0.0254         |
| $\mu_z^b$                                                             | -98.2113  | -97.4234  | 92.8229   | -89.3153  | -87.6124       |
| $ \mu ^b$                                                             | 408.7340  | 411.2611  | 422.7331  | 428.9598  | 427.2899       |
| $m_x^b$                                                               | 0.3583    | 0.3555    | -0.3387   | 0.3259    | 0.3197         |
| $m_y^b$                                                               | -1.4914   | -1.5006   | -1.5425   | -1.5652   | -1.5591        |
| $m_z^b$                                                               | 367.9551  | 370.5479  | 382.4752  | 389.0989  | 387.8496       |
| $ m ^b$                                                               | 1.8026    | 1.8687    | 1.9991    | 1.8884    | 1.8917         |
| $ \mu / m $                                                           | 226.7496  | 220.0739  | 211.4641  | 227.1531  | 225.8799       |
| $\theta^c$                                                            | 106.9     | 107.4     | 106.3     | 106.4     | 105.7          |
| $\cos\theta$                                                          | -0.2910   | -0.2993   | -0.2805   | -0.2829   | -0.2699        |
| $g_{lum}$                                                             | -0.0051   | -0.0054   | -0.0053   | -0.0050   | -0.0048        |

<sup>a</sup> Transition electric dipole moment  $\mu$  and transition magnetic dipole moment  $m$  are in a.u.

<sup>b</sup>  $\mu$  and  $m$  are in  $10^{-20}$  esu·cm and  $10^{-20}$  erg·G<sup>-1</sup>, respectively.

<sup>c</sup>  $\theta$  (in deg) represents the angle between  $\mu$  and  $m$ .

**Table S6.** Transition properties of [7]H-C optimized via B3LYP exchange-correlation functional in conjunction with different basis sets

|                                                                       | 6-31G(d)  | 6-311G(d) | 6-311G(2d,p) | def-TZVP  | def2-TZVP |
|-----------------------------------------------------------------------|-----------|-----------|--------------|-----------|-----------|
| <b><math>\mu</math> and <math>m</math> in atom units <sup>a</sup></b> |           |           |              |           |           |
| $\mu_x$                                                               | -1.6265   | -1.5832   | -1.5610      | -1.5598   | -1.5544   |
| $\mu_y$                                                               | 0.0000    | -0.0003   | -0.0001      | 0.0009    | 0.0003    |
| $\mu_z$                                                               | -0.3898   | -0.3920   | -0.3864      | 0.3663    | 0.3636    |
| $ \mu $                                                               | 1.6726    | 1.6310    | 1.6081       | 1.6022    | 1.5964    |
| $m_x$                                                                 | -0.0618   | -0.0805   | -0.1022      | -0.1172   | -0.1170   |
| $m_y$                                                                 | 0.0000    | 0.0000    | 0.0000       | -0.0001   | 0.0000    |
| $m_z$                                                                 | -1.7896   | -1.8981   | -1.9410      | 1.9439    | 1.9667    |
| $ m $                                                                 | 1.7907    | 1.8998    | 1.9437       | 1.9474    | 1.9702    |
| <b>Transition parameters in CGS units</b>                             |           |           |              |           |           |
| $\mu_x^b$                                                             | -413.4075 | -402.4019 | -396.7594    | -396.4544 | -395.0818 |
| $\mu_y^b$                                                             | 0.0000    | -0.0763   | -0.0254      | 0.2288    | 0.0763    |
| $\mu_z^b$                                                             | -99.0755  | -99.6346  | -98.2113     | 93.1025   | 92.4162   |
| $ \mu ^b$                                                             | 425.1138  | 414.5532  | 408.7340     | 407.2397  | 405.7468  |
| $m_x^b$                                                               | 0.0573    | 0.0747    | 0.0948       | 0.1087    | 0.1085    |
| $m_y^b$                                                               | 0.0000    | 0.0000    | 0.0000       | 0.0001    | 0.0000    |
| $m_z^b$                                                               | 1.6597    | 1.7603    | 1.8001       | -1.8028   | -1.8239   |
| $ m ^b$                                                               | 1.6607    | 1.7619    | 1.8026       | 1.8060    | 1.8271    |
| $ \mu / m $                                                           | 255.9899  | 235.2900  | 226.7496     | 225.4866  | 222.0661  |
| $\theta^c$                                                            | 105.5     | 106.3     | 106.9        | 106.7     | 106.6     |
| $\cos\theta$                                                          | -0.2665   | -0.2813   | -0.2910      | -0.2868   | -0.2852   |
| $g_{lum}$                                                             | -0.0042   | -0.0048   | -0.0051      | -0.0051   | -0.0051   |

<sup>a</sup> Transition electric dipole moment  $\mu$  and transition magnetic dipole moment  $m$  are in a.u.

<sup>b</sup>  $\mu$  and  $m$  are in  $10^{-20}$  esu·cm and  $10^{-20}$  erg·G<sup>-1</sup>, respectively.

<sup>c</sup>  $\theta$  (in deg) represents the angle between  $\mu$  and  $m$ .

### III. Supplementary Figures S1-S12

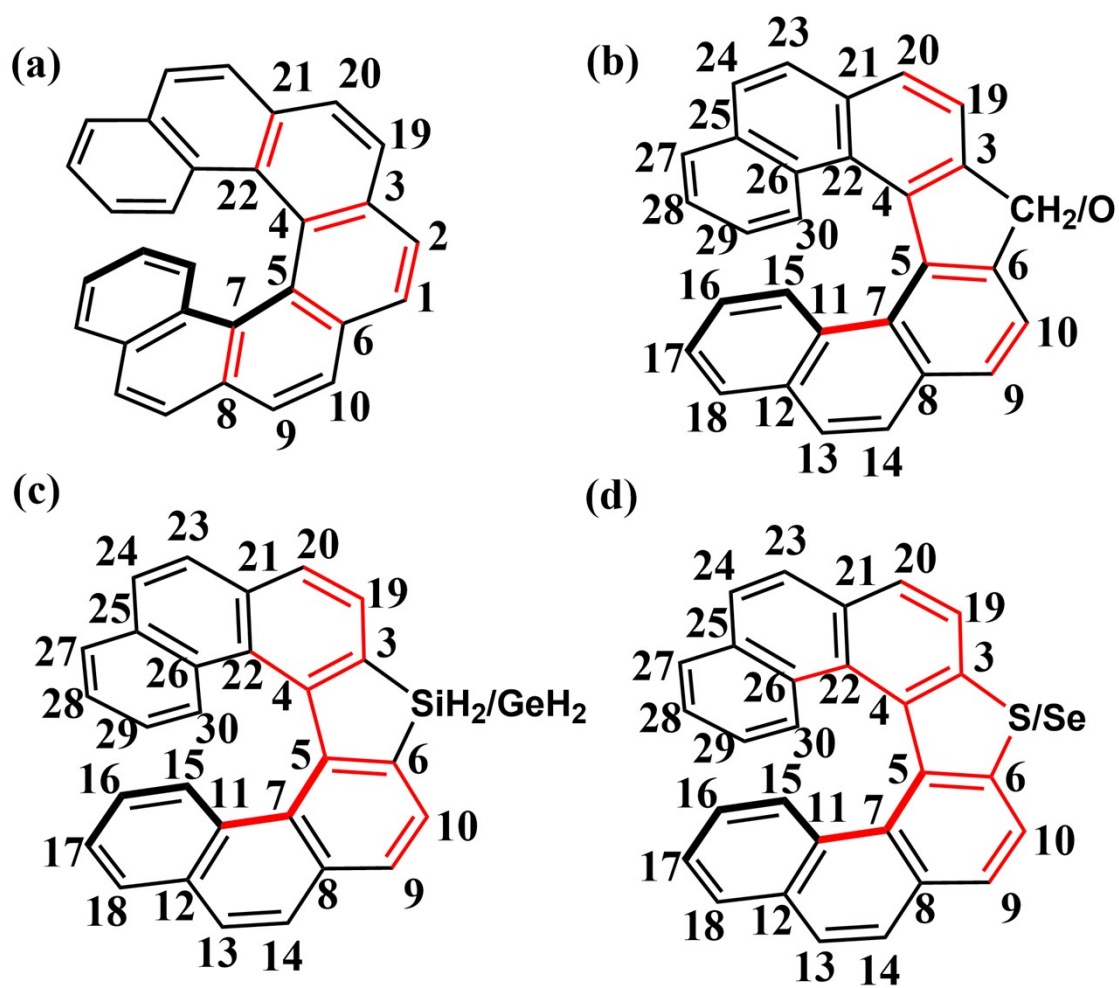

**Figure S1.** Considerable bond lengths variations (marked as red) between  $S_0$  and  $S_1$  states for [7]helicene and its derivatives.

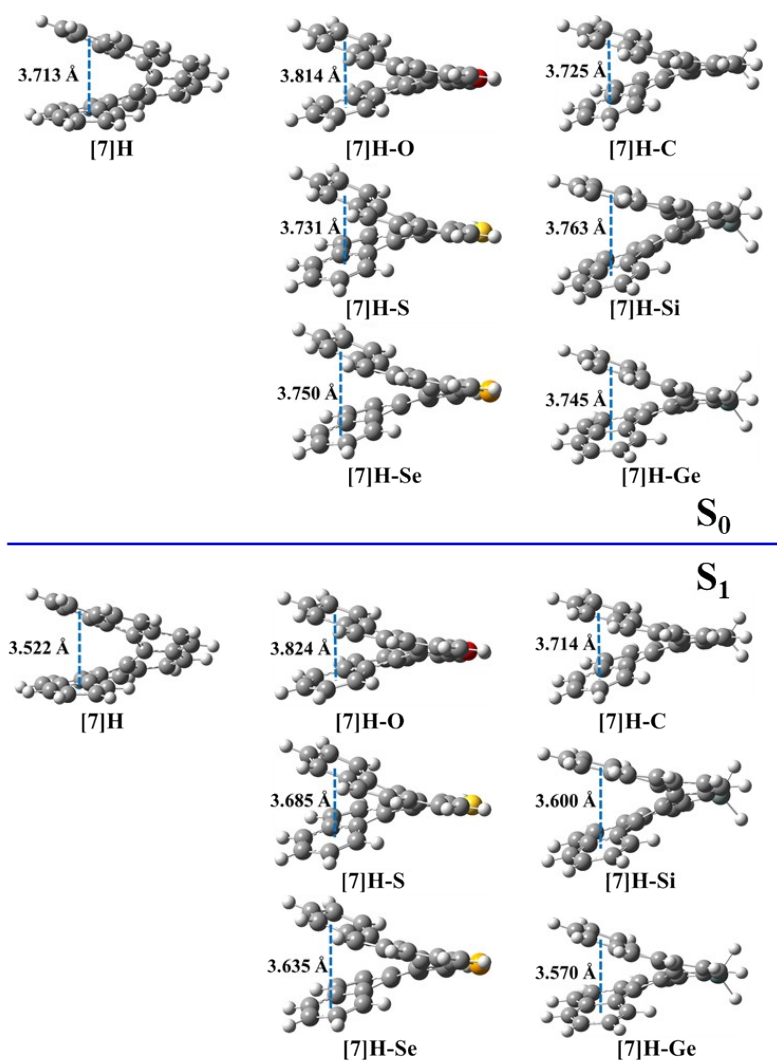

**Figure S2.** Centroid distances ( $d_c$ ) of the two terminal benzene rings in [7]helicene and its derivatives at  $S_0$  and  $S_1$  states.

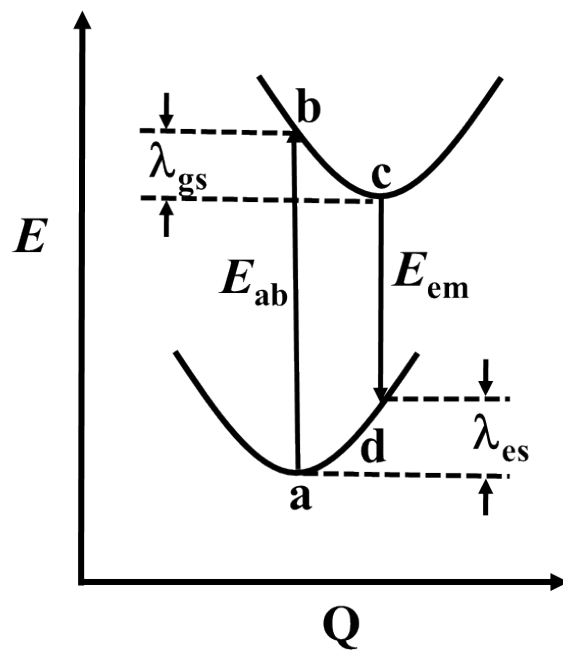

**Figure S3.** Schematic representation of the adiabatic potential energy surfaces for  $S_0$  and  $S_1$ ,  $Q$  is the nuclear configuration.

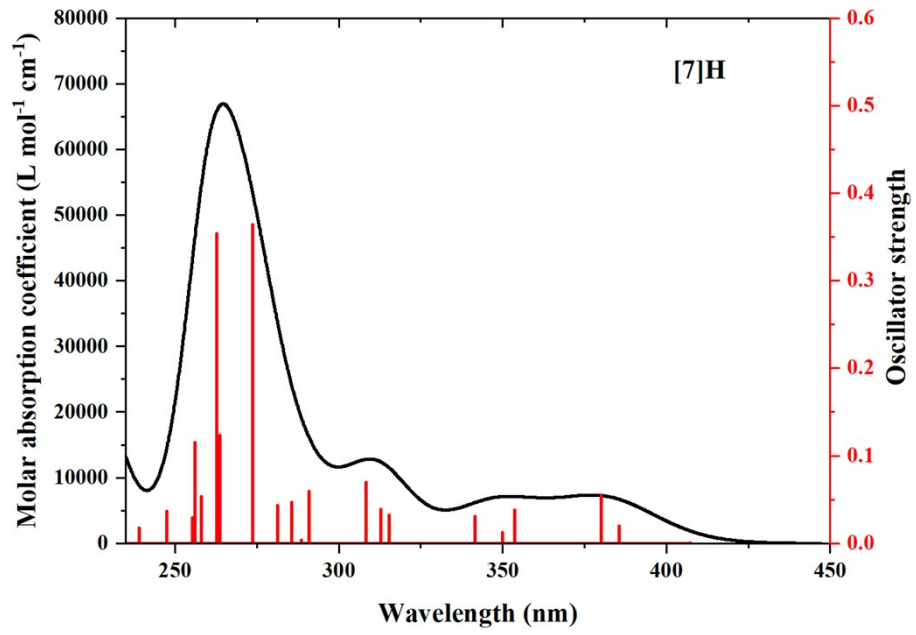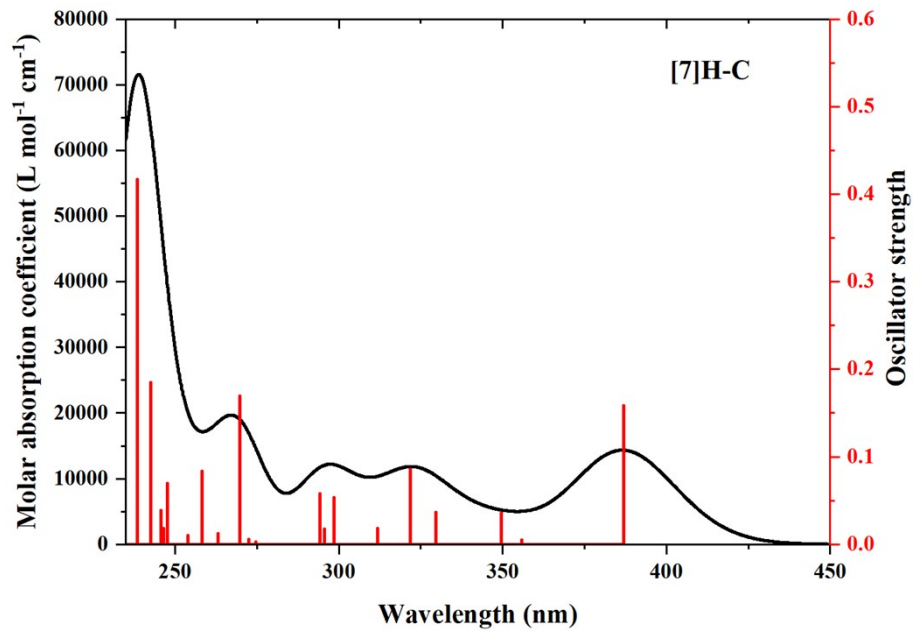



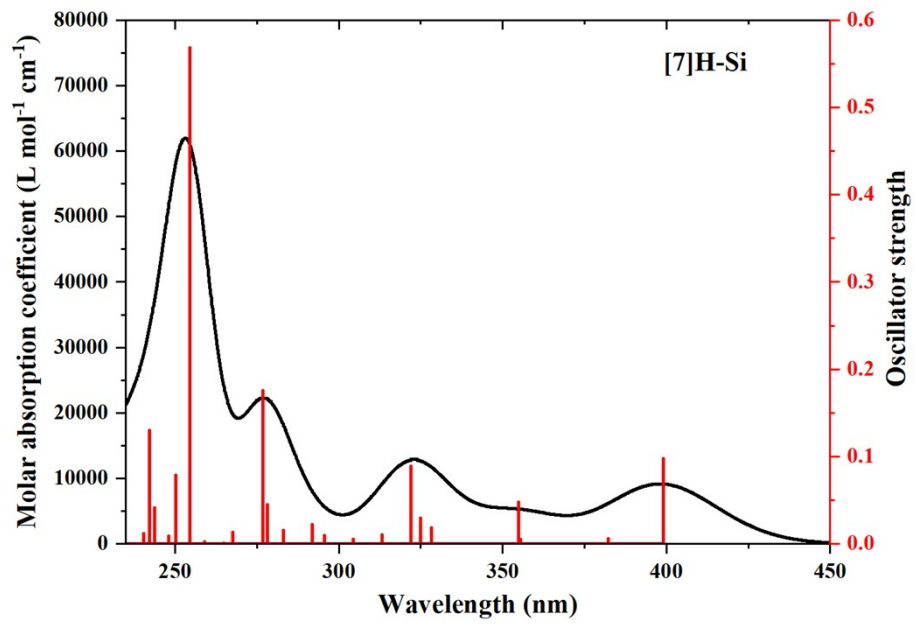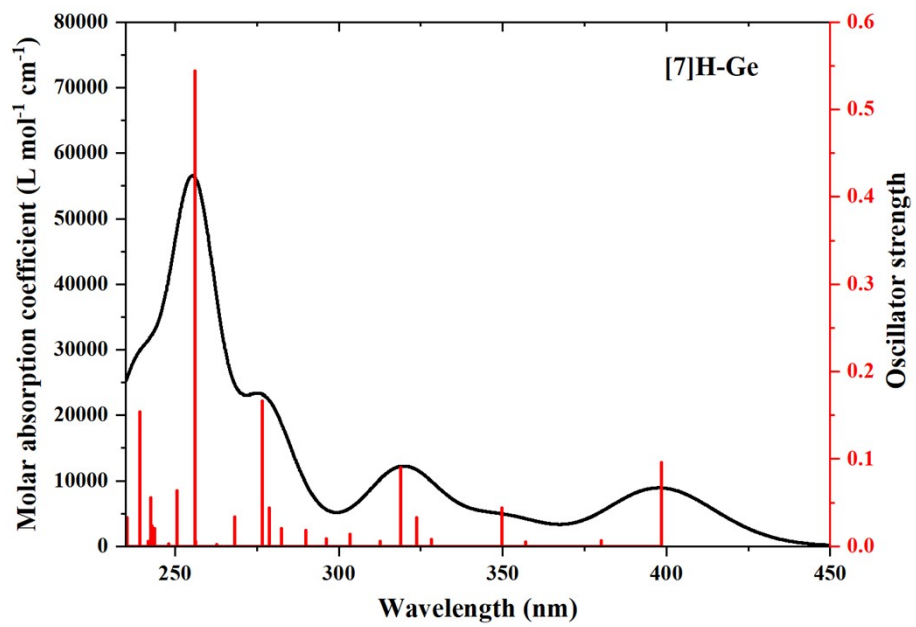

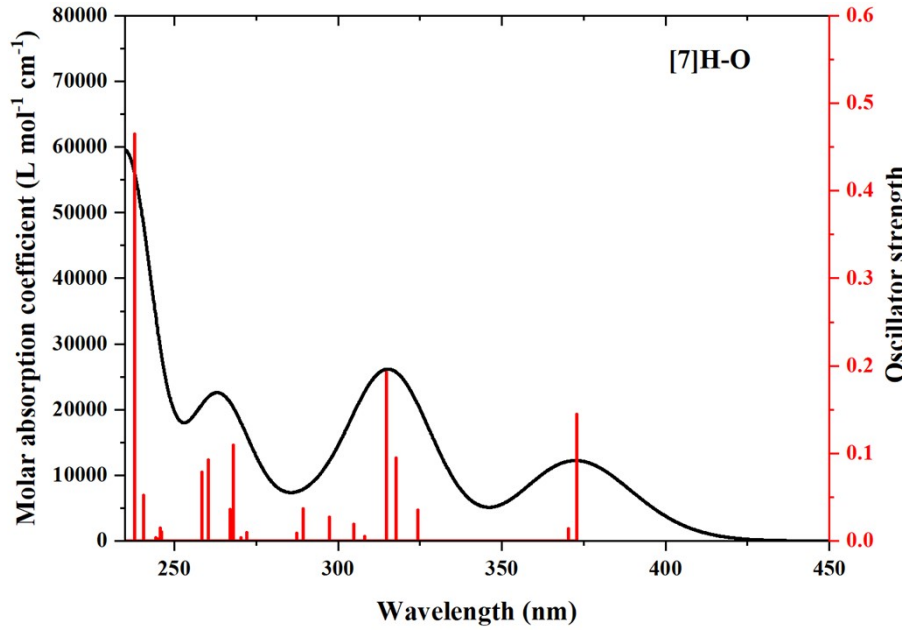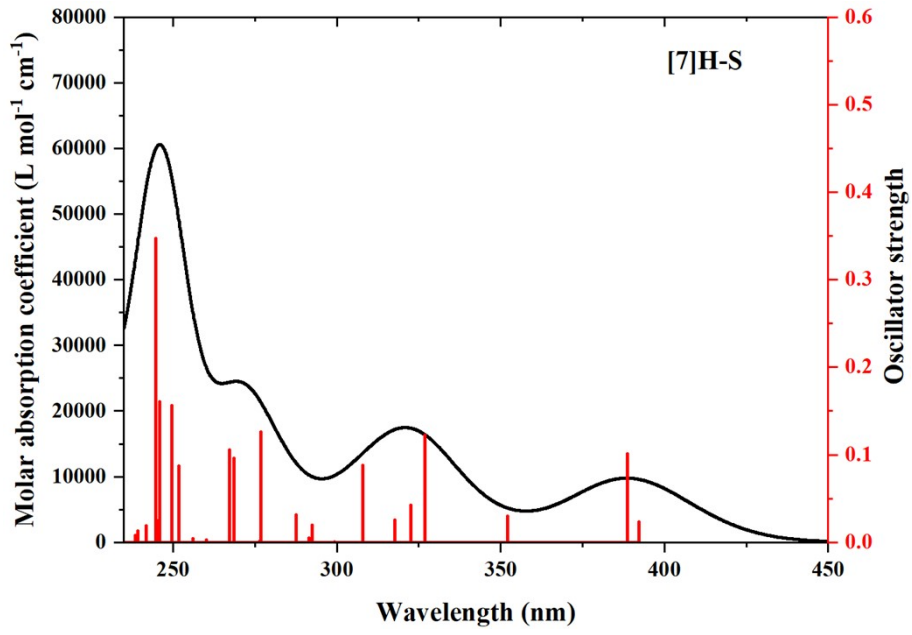

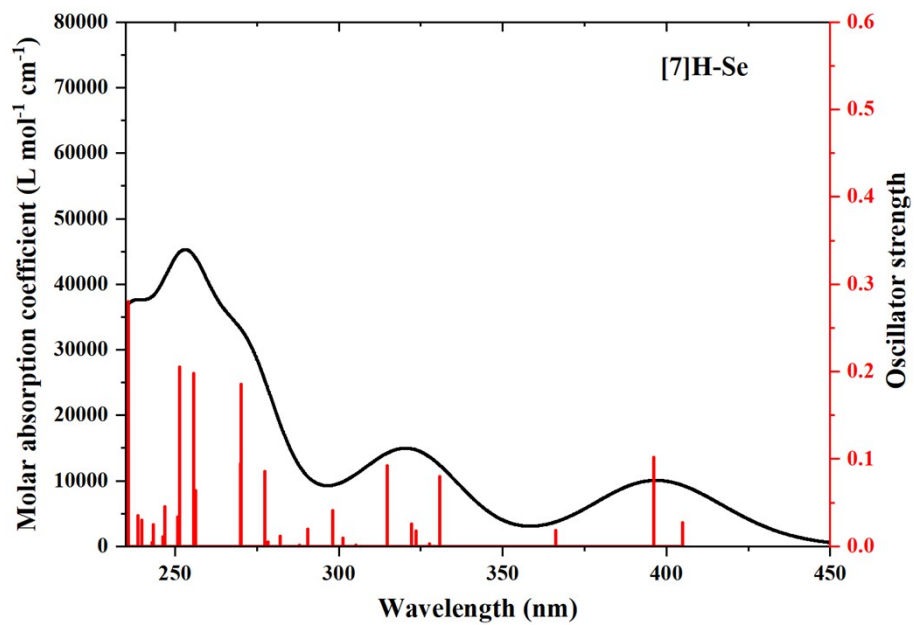

Figure S4. Calculated UV-vis spectra and oscillator strengths of the helicenes.

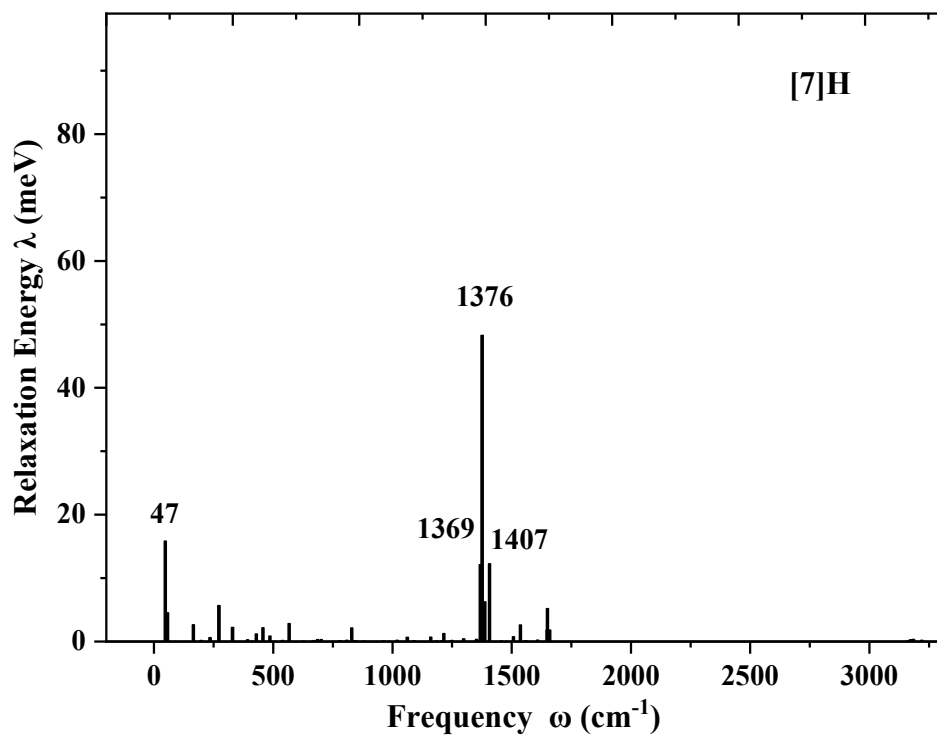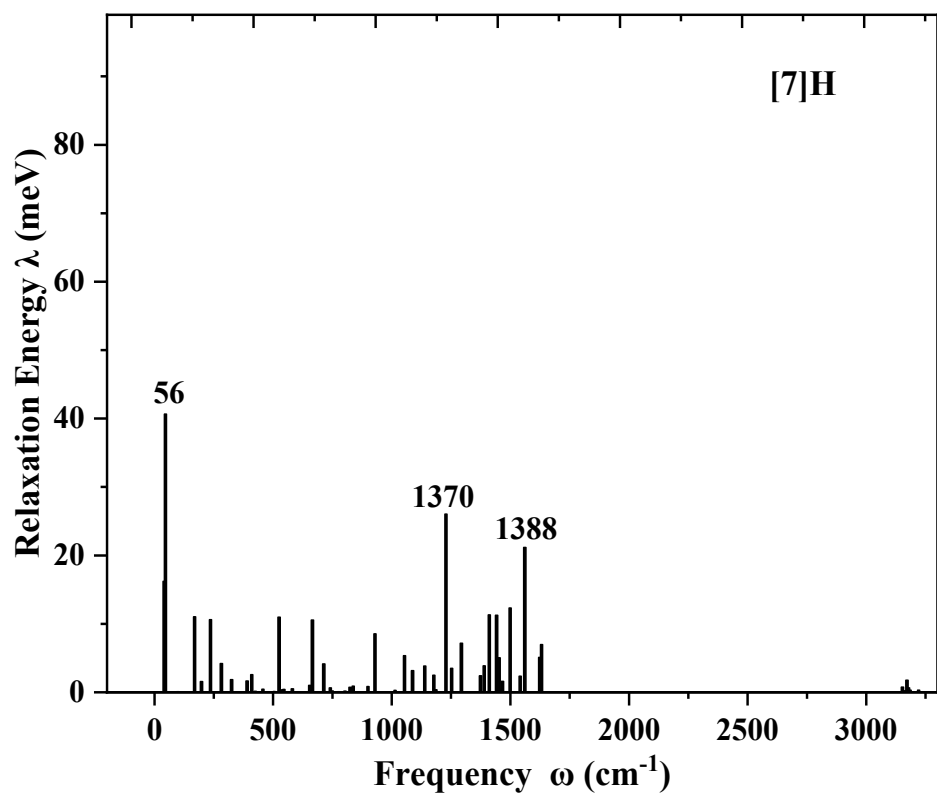

**Figure S5.** Calculated reorganization energy versus normal mode frequencies in solution phase of [7]H at  $S_0$  (top) and  $S_1$  (bottom) states.

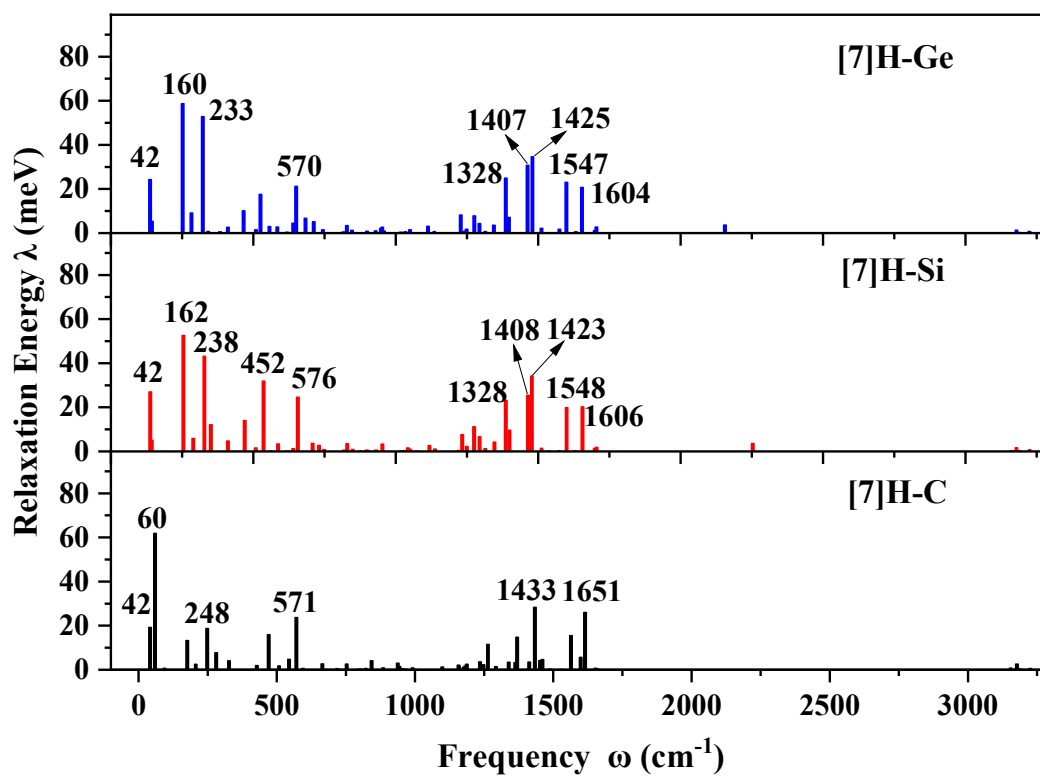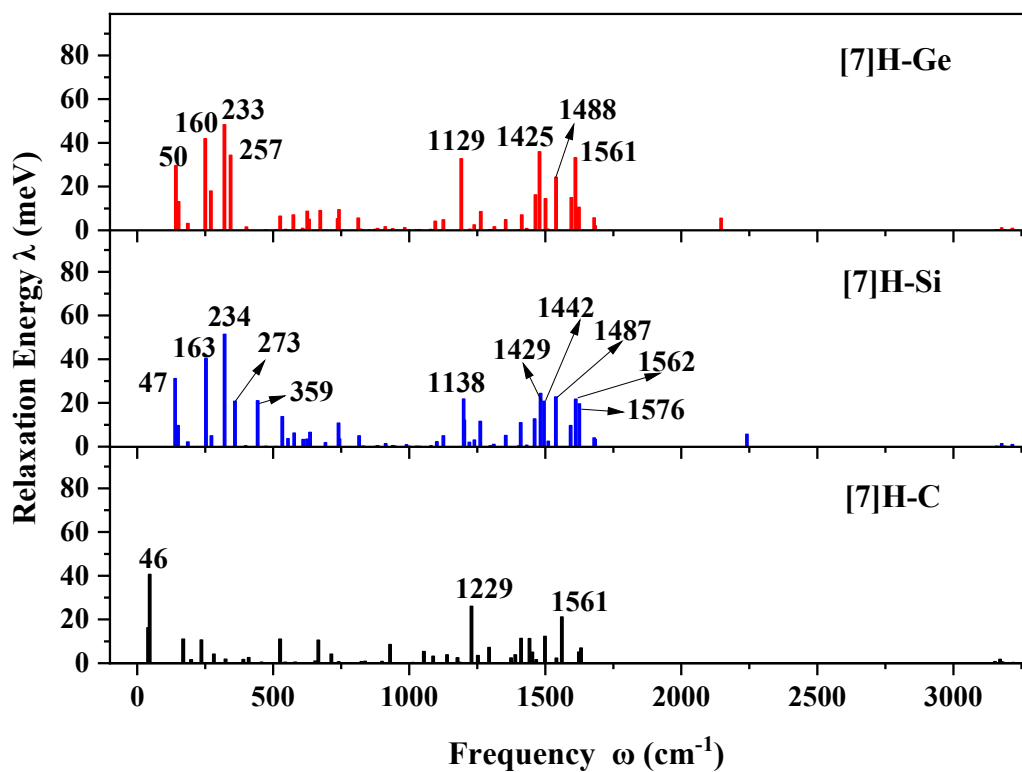

**Figure S6.** Calculated reorganization energy versus normal mode frequencies in solution phase of carbon group [7]H derivations at  $S_0$  (top) and  $S_1$  (bottom) states.

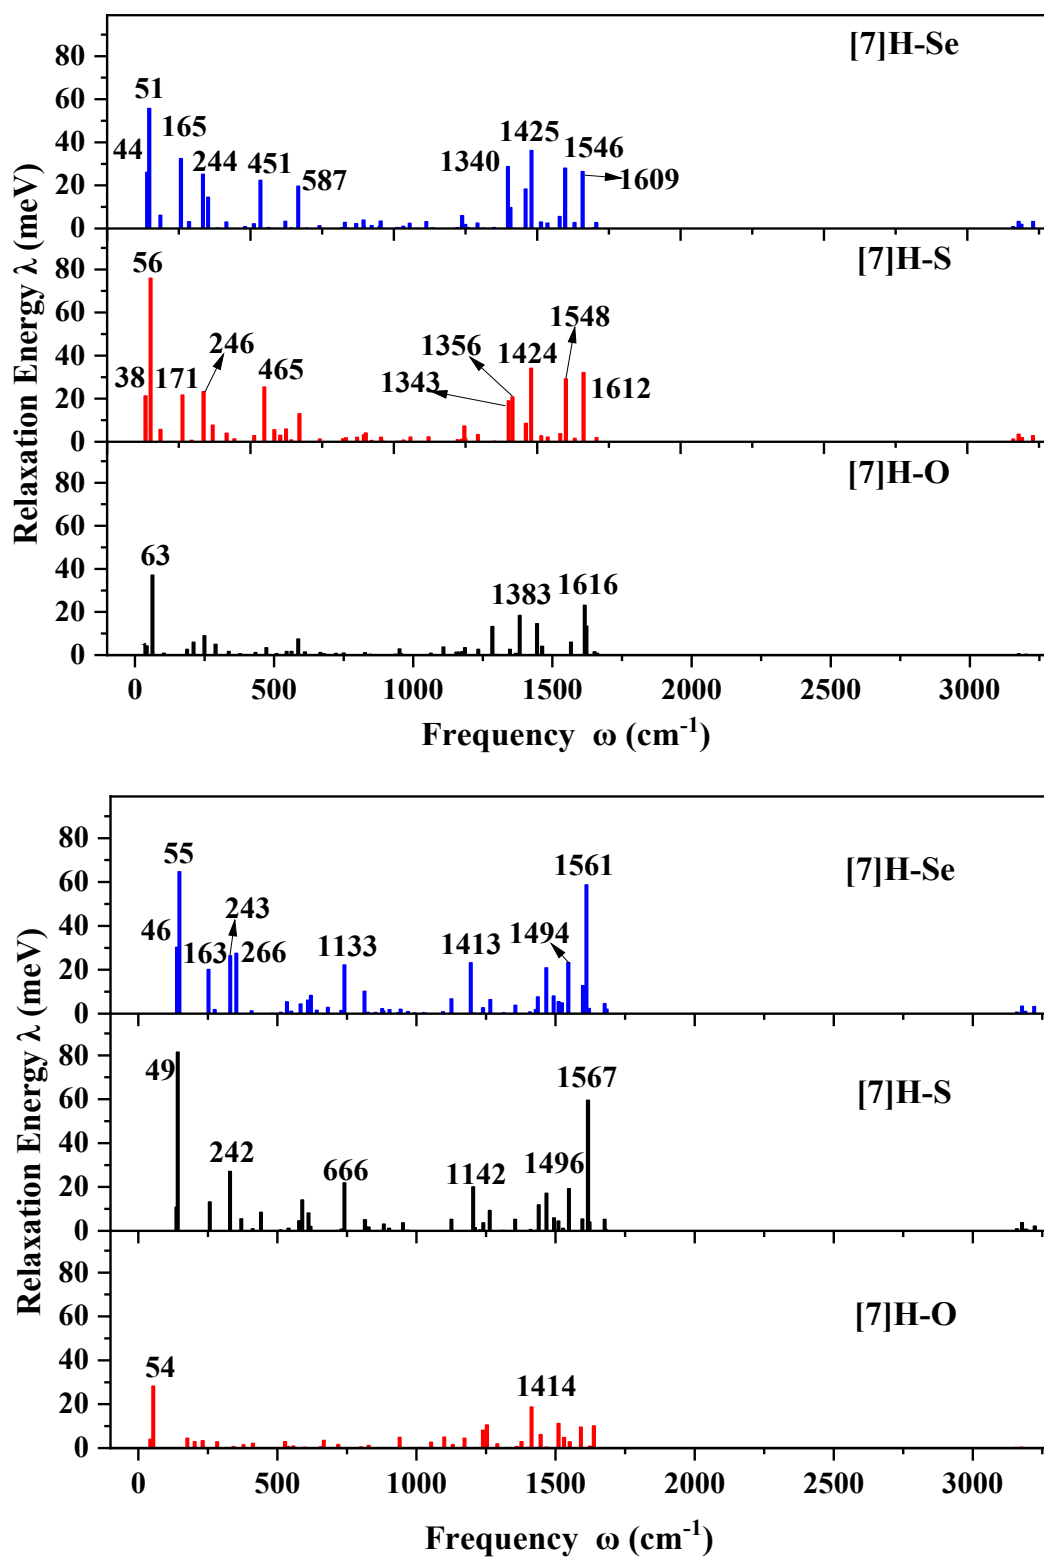

**Figure S7.** Calculated reorganization energy versus normal mode frequencies in solution phase of oxygen group [7]H derivations at S<sub>0</sub> (top) and S<sub>1</sub> (bottom) states.

**[7]H (S<sub>0</sub>)**

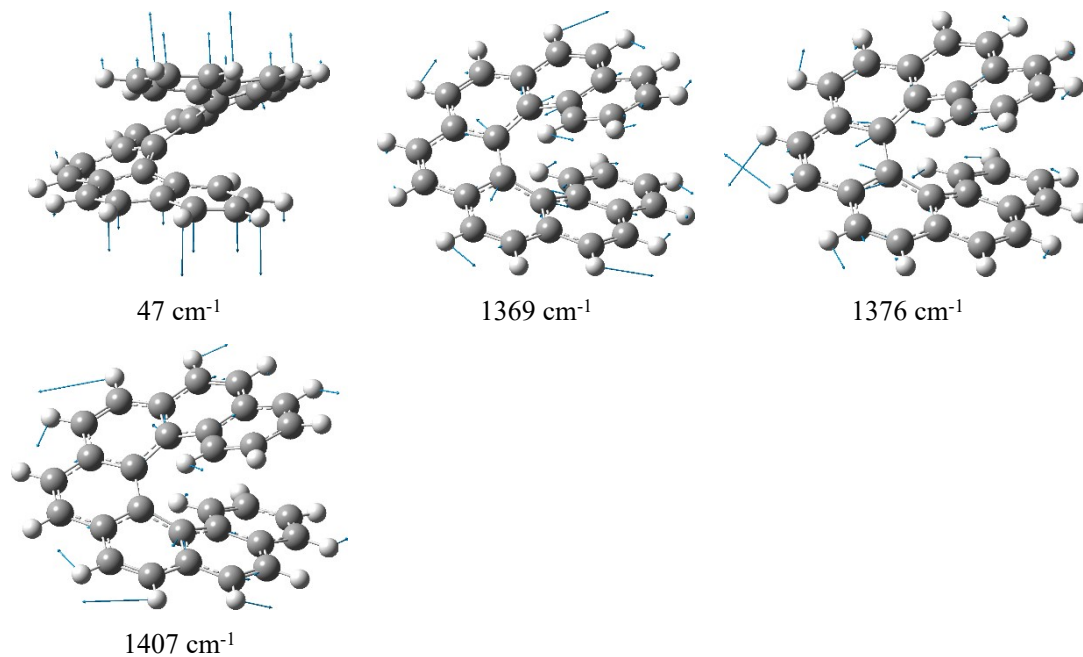

**[7]H (S<sub>1</sub>)**

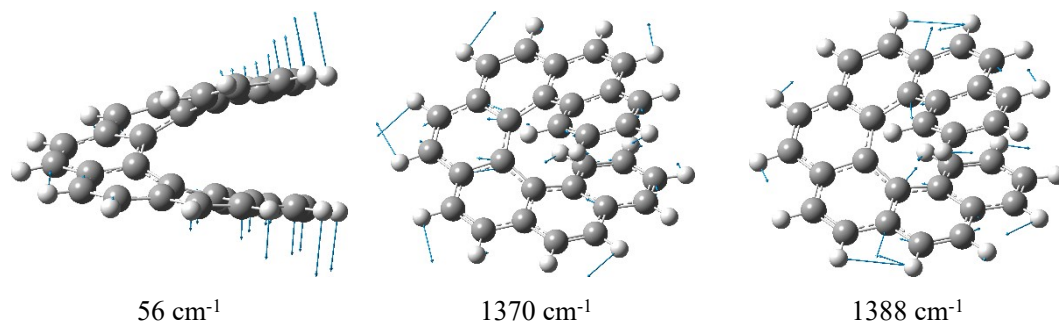

**Figure S8.** Selected normal modes of [7]H at S<sub>0</sub> and S<sub>1</sub> states with prominent relaxation energies.

**[7]H-C ( $S_0$ )**

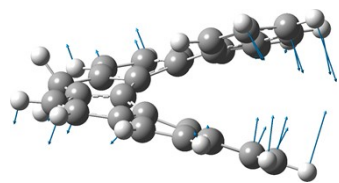

42  $\text{cm}^{-1}$

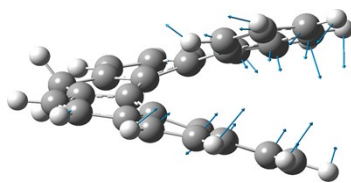

60  $\text{cm}^{-1}$

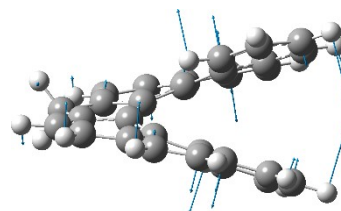

248  $\text{cm}^{-1}$

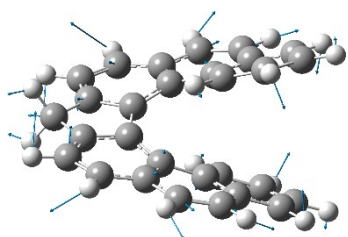

571  $\text{cm}^{-1}$

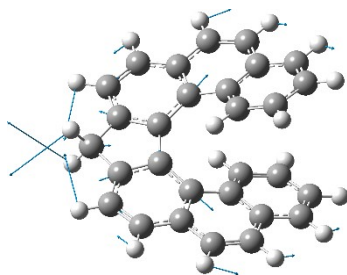

1433  $\text{cm}^{-1}$

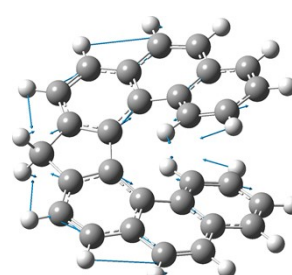

1615  $\text{cm}^{-1}$

**[7]H-C ( $S_1$ )**

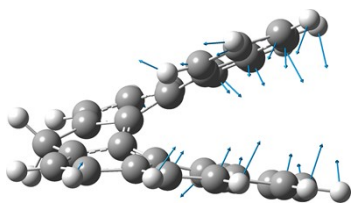

46  $\text{cm}^{-1}$

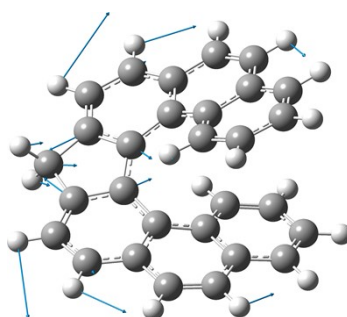

1229  $\text{cm}^{-1}$

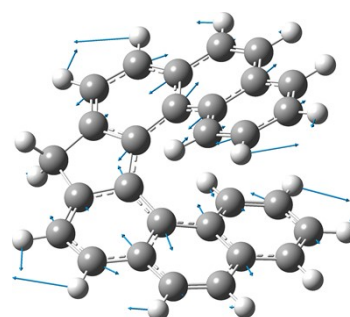

1561  $\text{cm}^{-1}$

**[7]H-Si ( $S_0$ )**

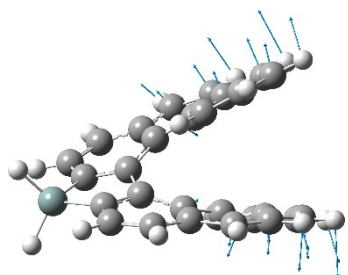

42  $\text{cm}^{-1}$

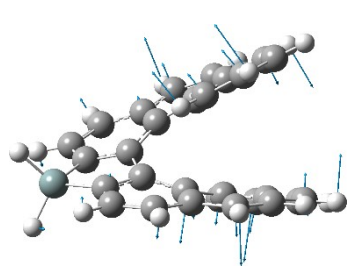

162  $\text{cm}^{-1}$

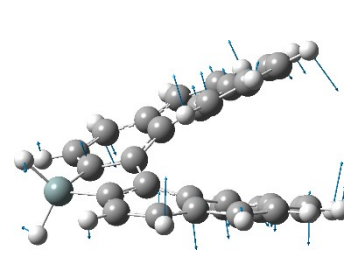

238  $\text{cm}^{-1}$



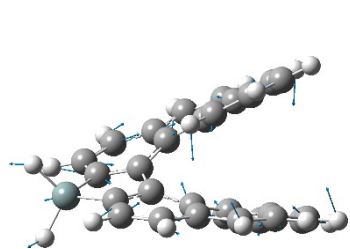

452  $\text{cm}^{-1}$

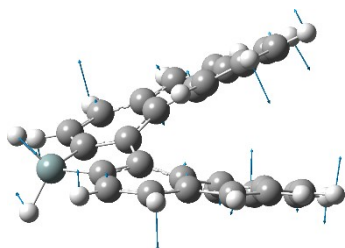

576  $\text{cm}^{-1}$

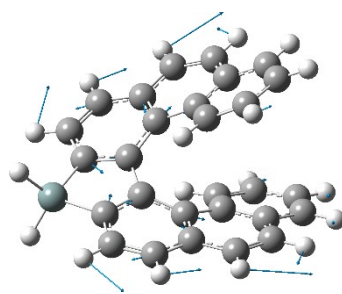

1328  $\text{cm}^{-1}$

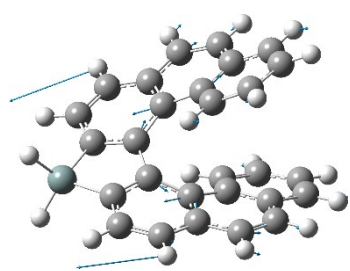

1408  $\text{cm}^{-1}$

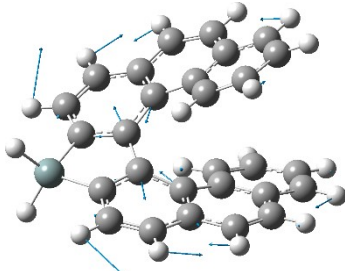

1423  $\text{cm}^{-1}$

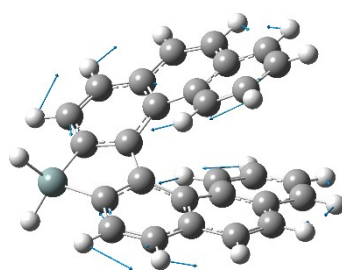

1548  $\text{cm}^{-1}$

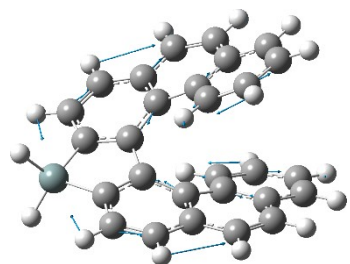

1606  $\text{cm}^{-1}$

### [7]H-Si ( $S_1$ )

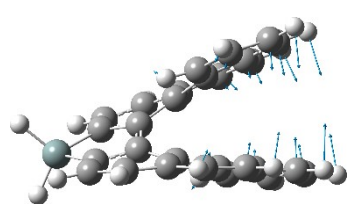

47  $\text{cm}^{-1}$

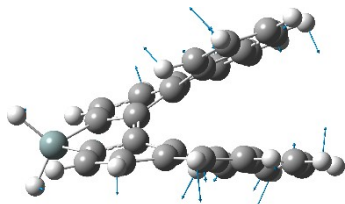

163  $\text{cm}^{-1}$

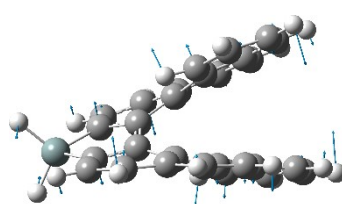

234  $\text{cm}^{-1}$

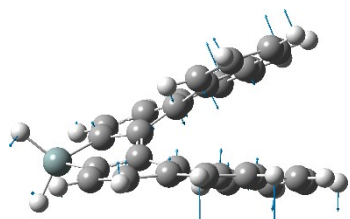

273  $\text{cm}^{-1}$

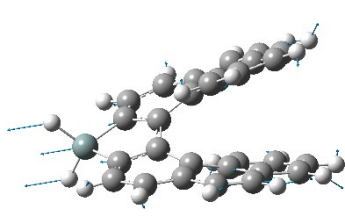

359  $\text{cm}^{-1}$

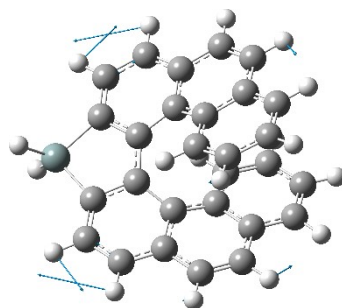

1138  $\text{cm}^{-1}$

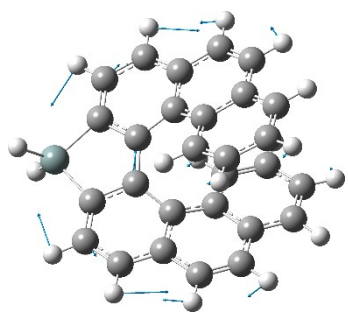

1429  $\text{cm}^{-1}$

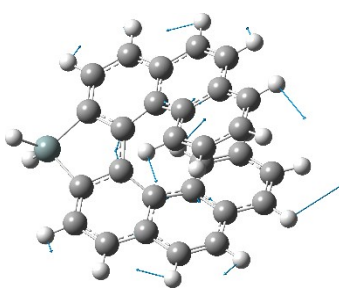

1442  $\text{cm}^{-1}$

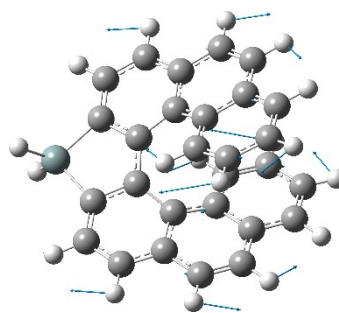

1487  $\text{cm}^{-1}$

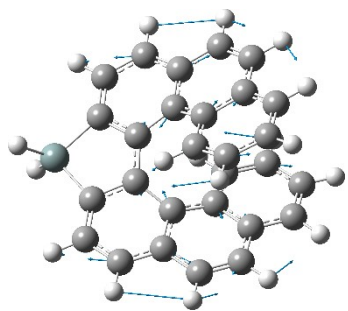

1562  $\text{cm}^{-1}$

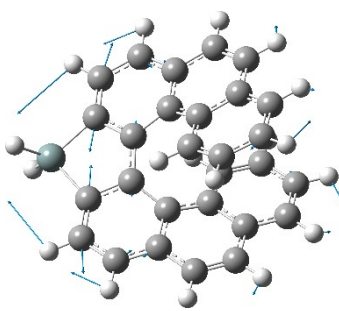

1576  $\text{cm}^{-1}$

### [7]H-Ge ( $S_0$ )

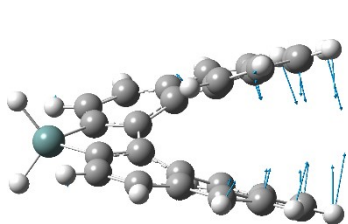

42  $\text{cm}^{-1}$

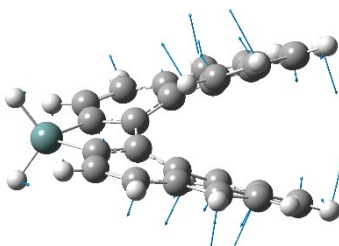

160  $\text{cm}^{-1}$

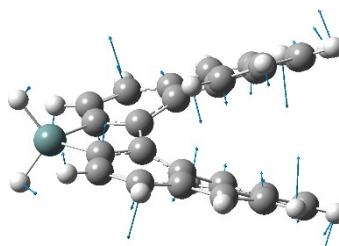

233  $\text{cm}^{-1}$

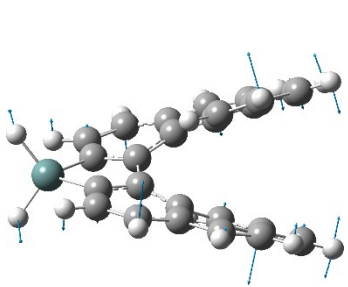

570  $\text{cm}^{-1}$

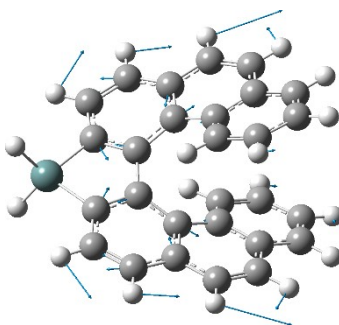

1328  $\text{cm}^{-1}$

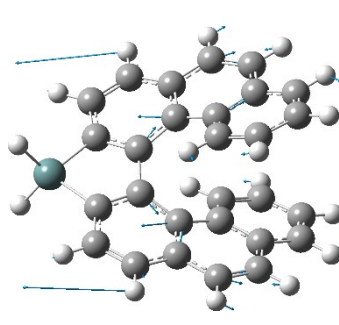

1407  $\text{cm}^{-1}$

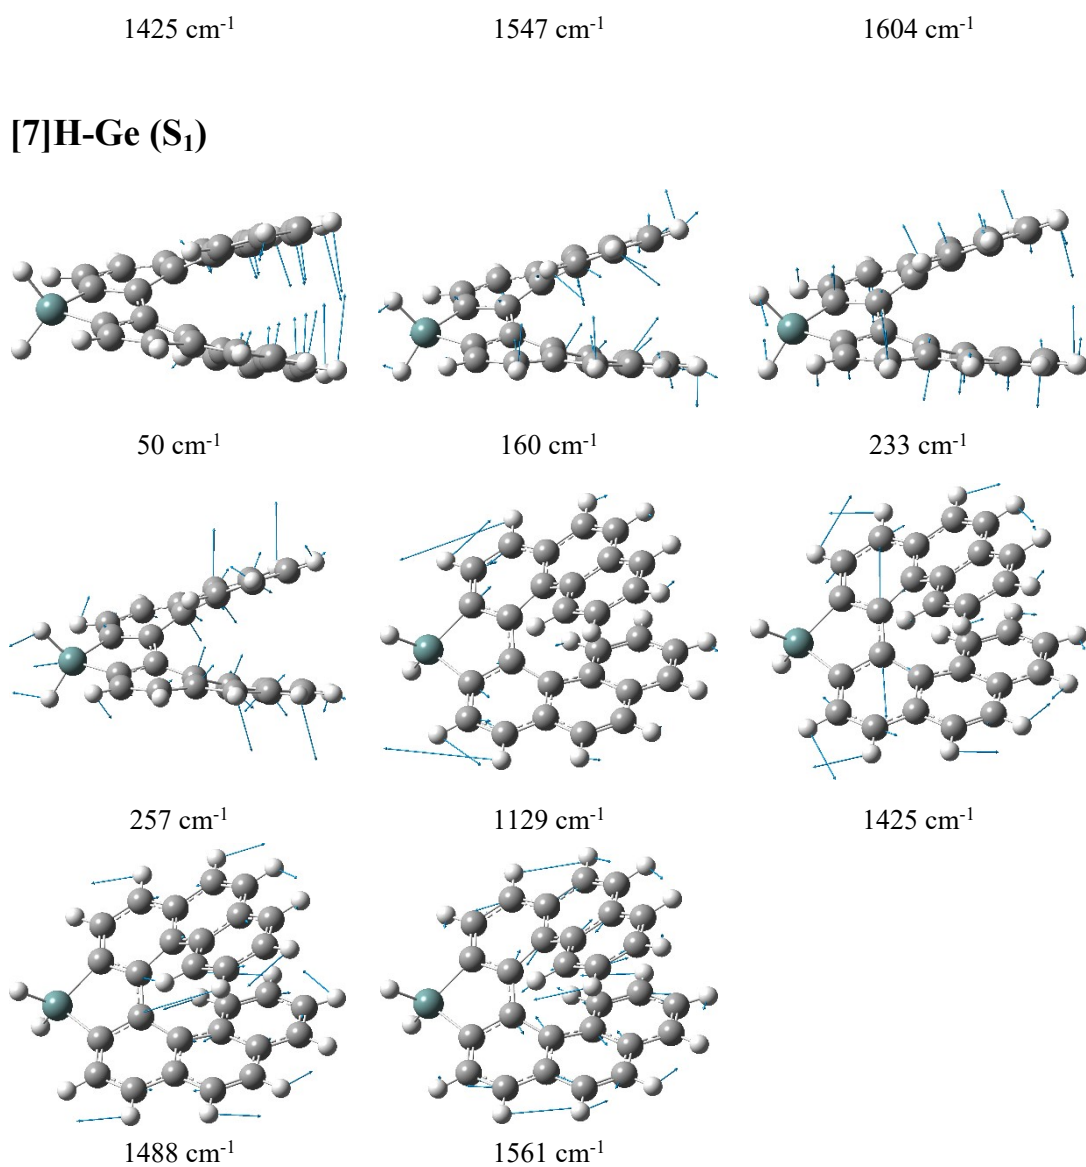

**Figure S9.** Selected normal modes of [7]H-C, [7]H-Si, and [7]H-Ge at both  $S_0$  and  $S_1$  states with prominent relaxation energies.

**[7]H-O ( $S_0$ )**

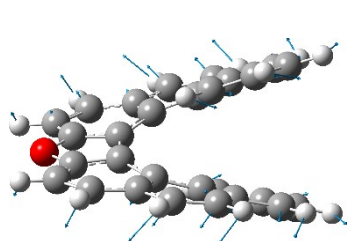

63  $\text{cm}^{-1}$

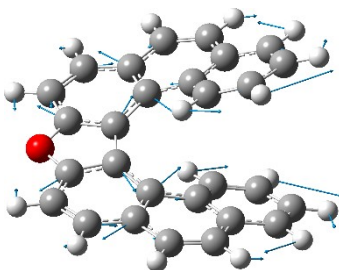

1383  $\text{cm}^{-1}$

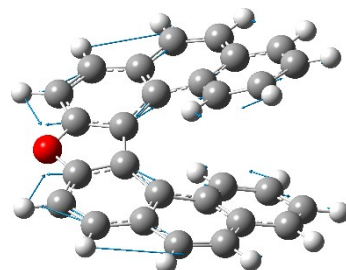

1616  $\text{cm}^{-1}$

**[7]H-O ( $S_1$ )**

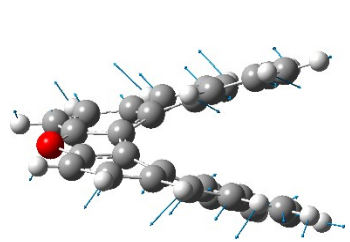

54  $\text{cm}^{-1}$

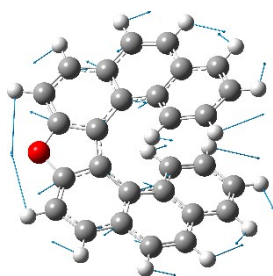

1414  $\text{cm}^{-1}$

**[7]H-S ( $S_0$ )**

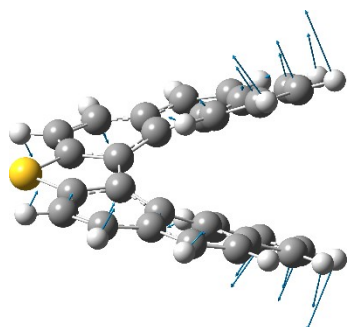

38  $\text{cm}^{-1}$

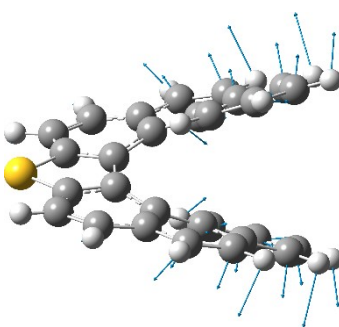

56  $\text{cm}^{-1}$

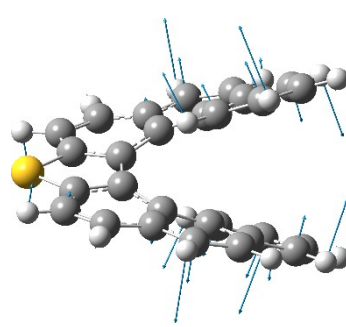

171  $\text{cm}^{-1}$

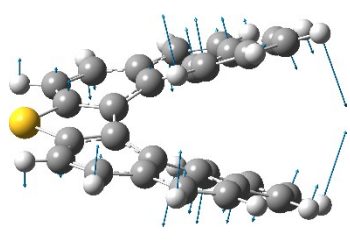

246  $\text{cm}^{-1}$

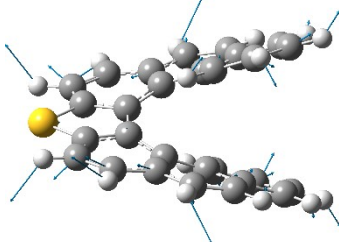

465  $\text{cm}^{-1}$

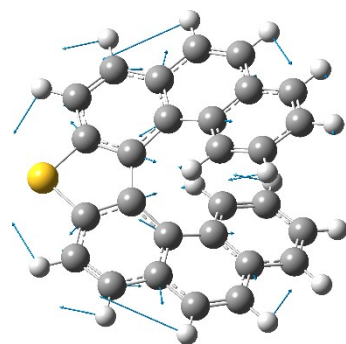

1343  $\text{cm}^{-1}$

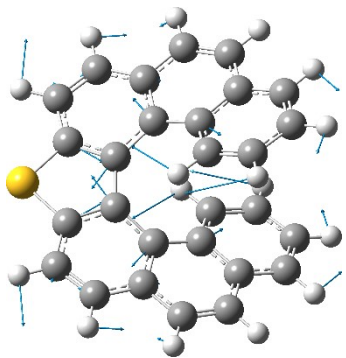

1356  $\text{cm}^{-1}$

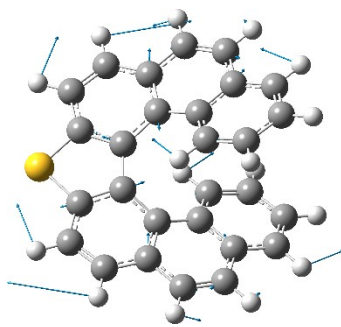

1424  $\text{cm}^{-1}$

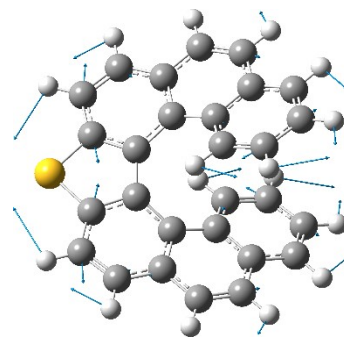

1548  $\text{cm}^{-1}$

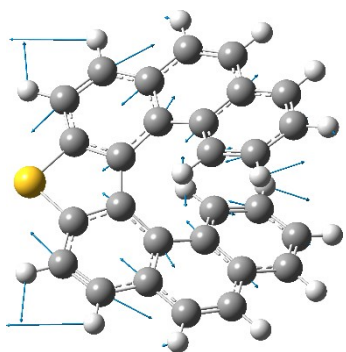

1612  $\text{cm}^{-1}$

### [7]H-S ( $S_1$ )

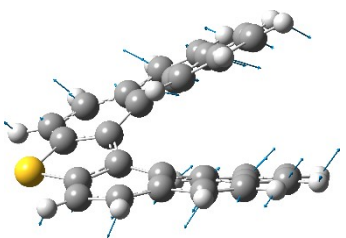

49  $\text{cm}^{-1}$

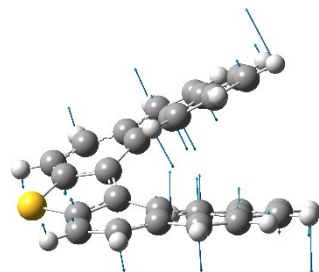

242  $\text{cm}^{-1}$

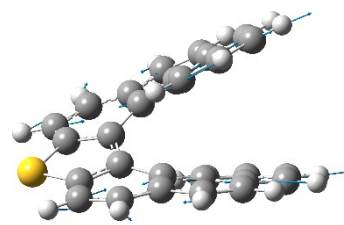

666  $\text{cm}^{-1}$

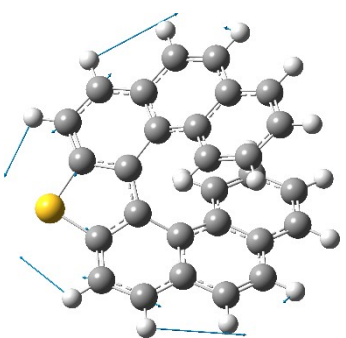

1142  $\text{cm}^{-1}$

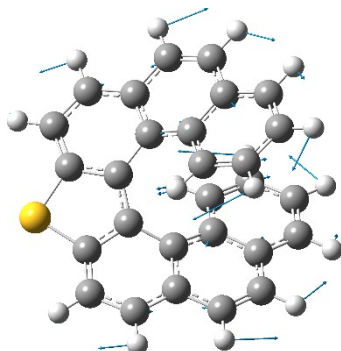

1496  $\text{cm}^{-1}$

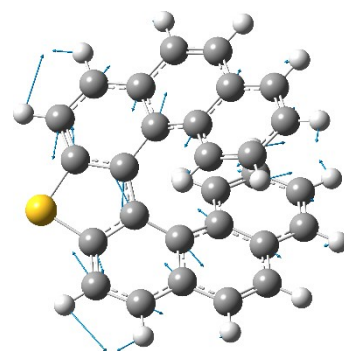

1567  $\text{cm}^{-1}$

[7]H-Se ( $S_0$ )

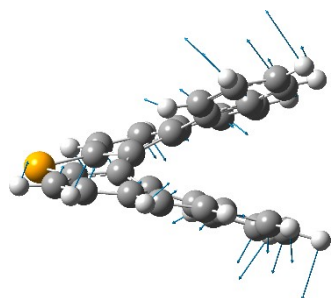

44  $\text{cm}^{-1}$

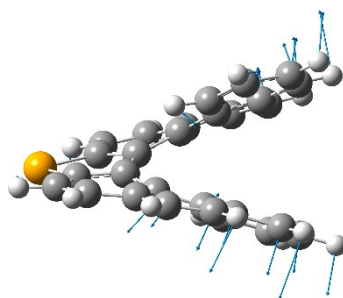

51  $\text{cm}^{-1}$

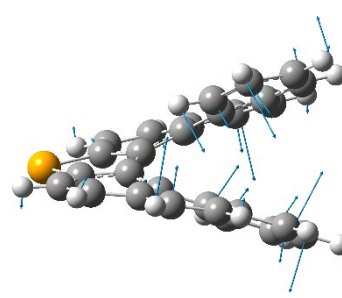

165  $\text{cm}^{-1}$

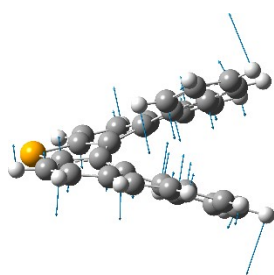

244  $\text{cm}^{-1}$

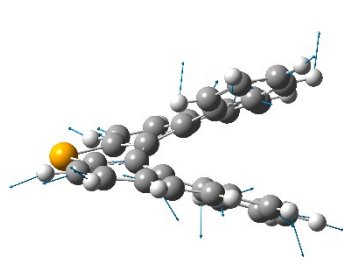

451  $\text{cm}^{-1}$

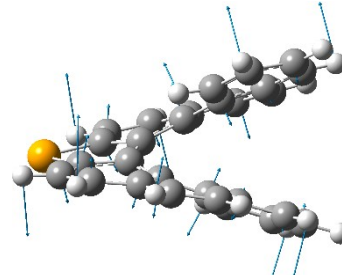

587  $\text{cm}^{-1}$

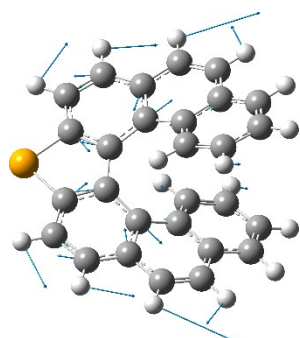

1340  $\text{cm}^{-1}$

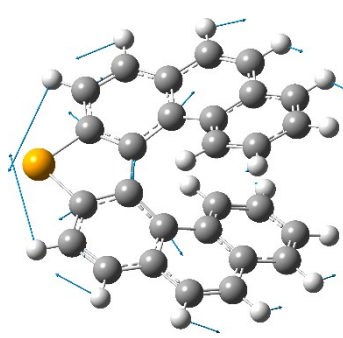

1425  $\text{cm}^{-1}$

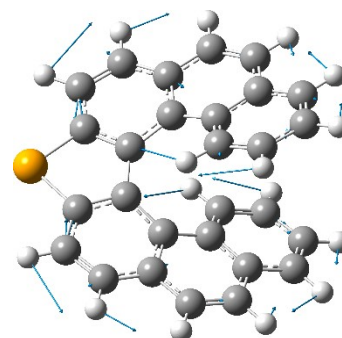

1546  $\text{cm}^{-1}$

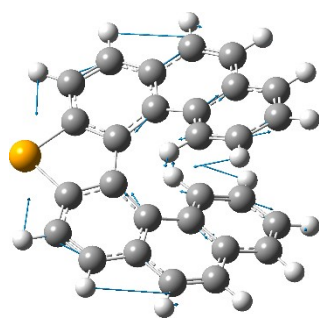

1609  $\text{cm}^{-1}$

[7]H-Se ( $S_1$ )

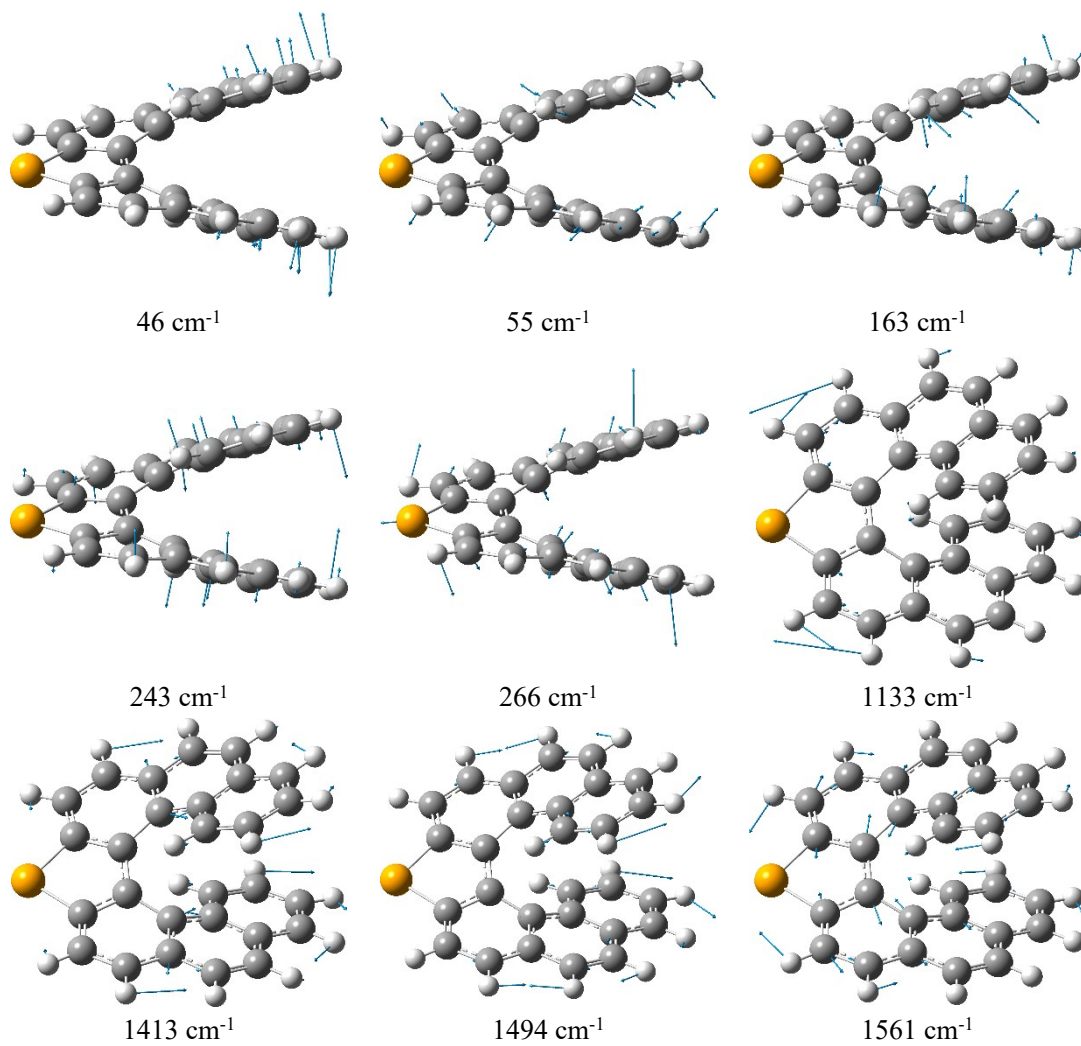

**Figure S10.** Selected normal modes of [7]H-O, [7]H-S, and [7]H-Se at both  $S_0$  and  $S_1$  states with prominent relaxation energies.

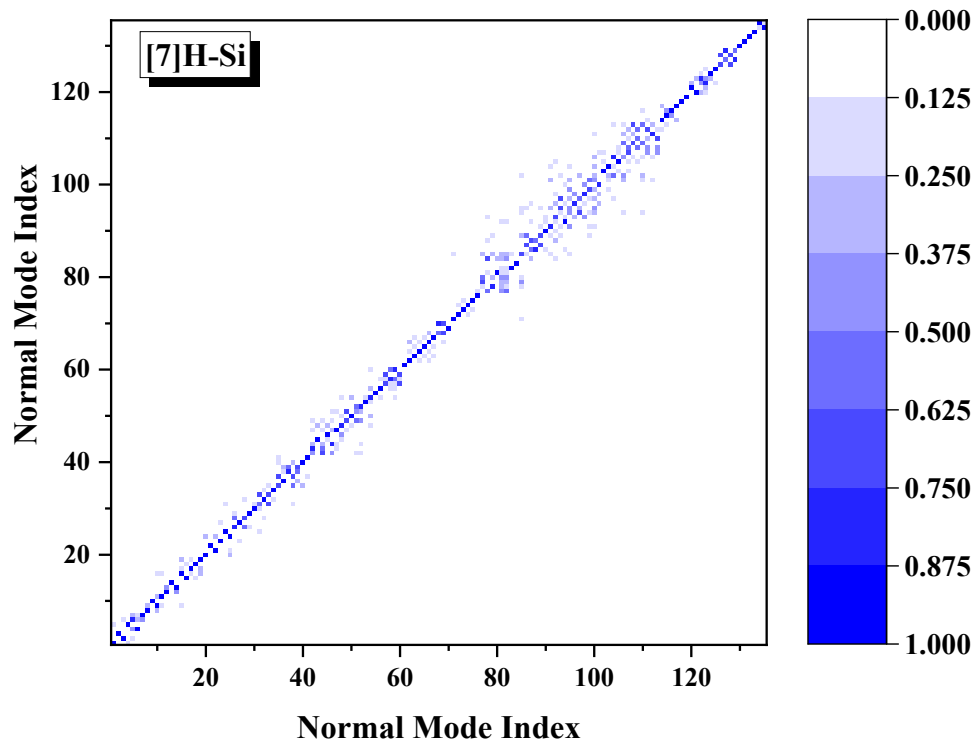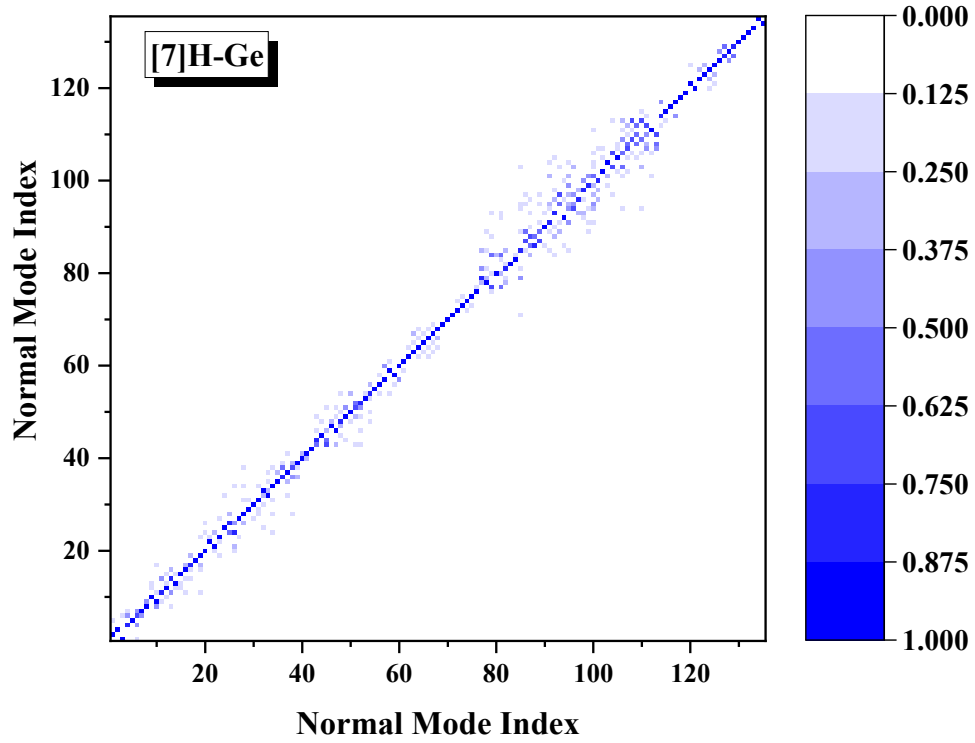



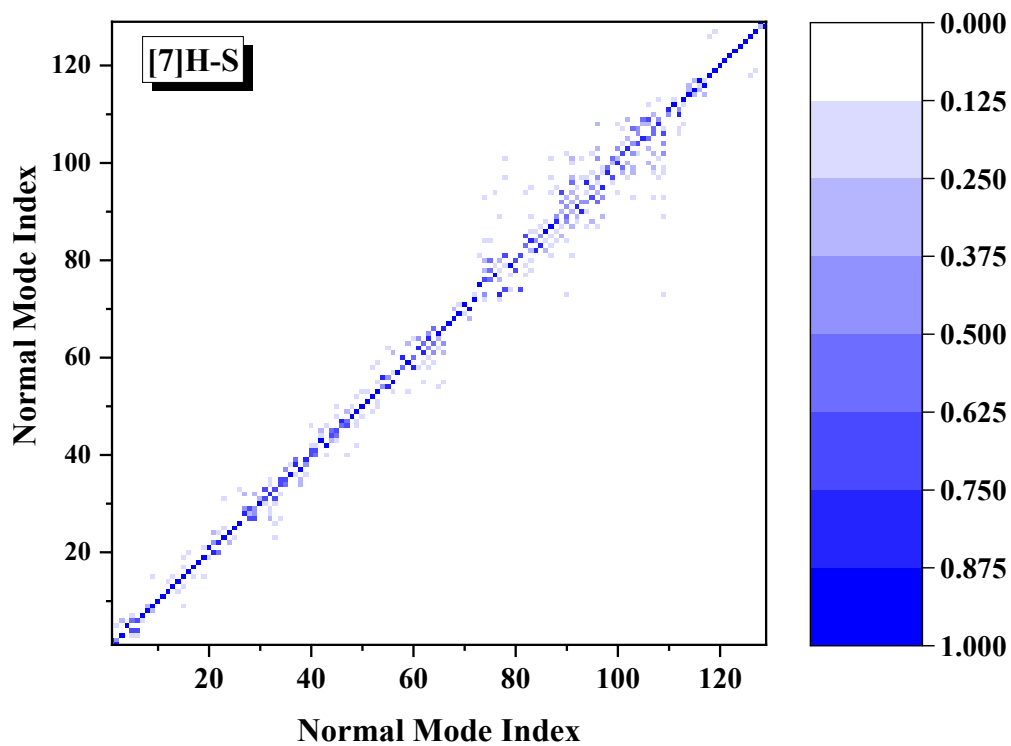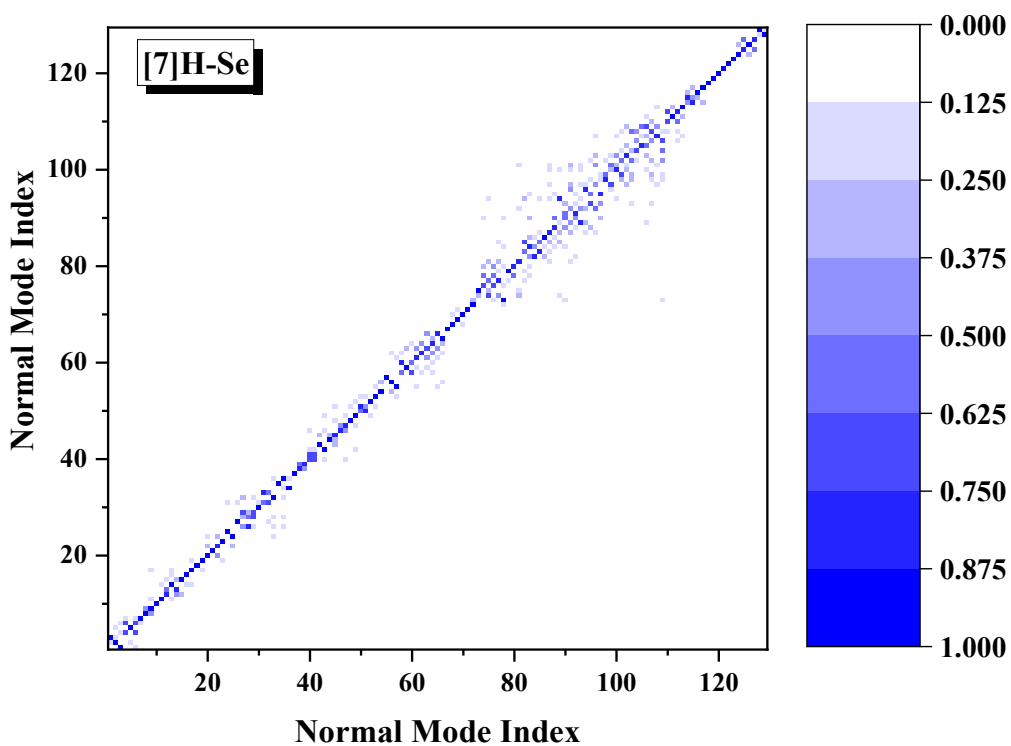

Figure S11. Contour maps of the Dushinsky rotation matrix of  $[7]\text{H-Si}$ ,  $[7]\text{H-Ge}$ ,  $[7]\text{H-S}$ , and  $[7]\text{H-Se}$ .

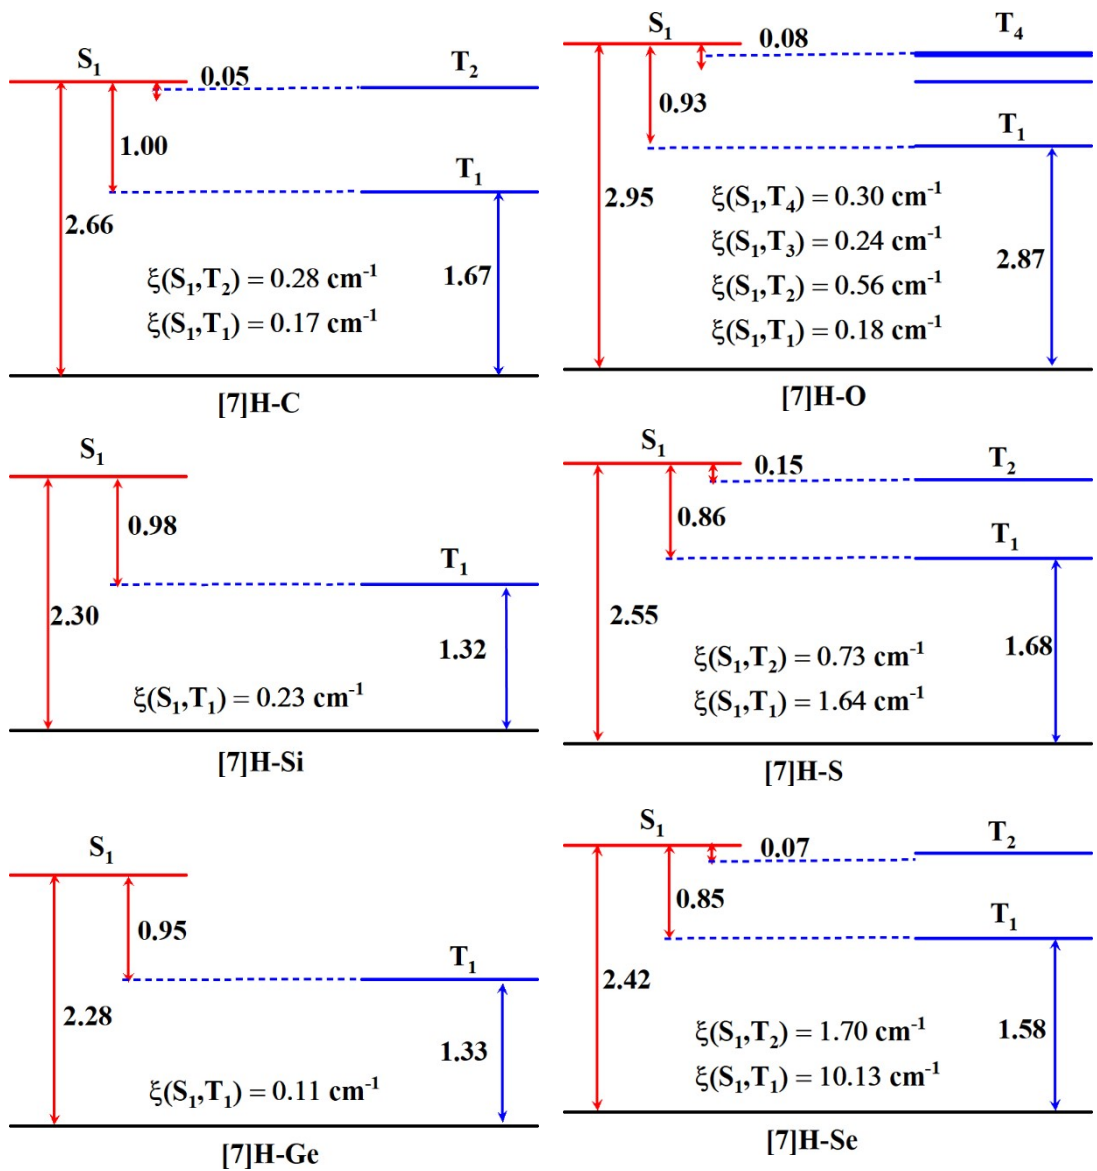

**Figure 12.** Energy level diagrams and SOC coefficients ( $\xi$ ).

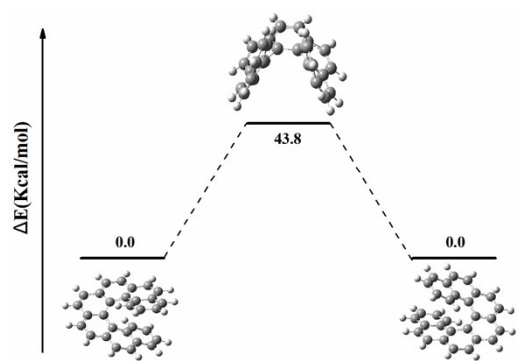

**[7]H**

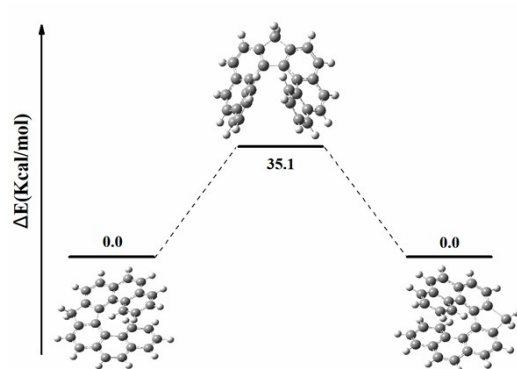

**[7]H-C**

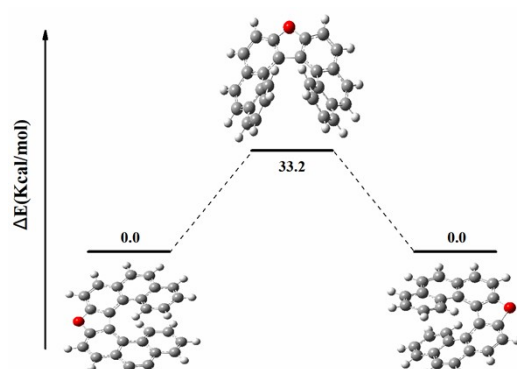

**[7]H-O**

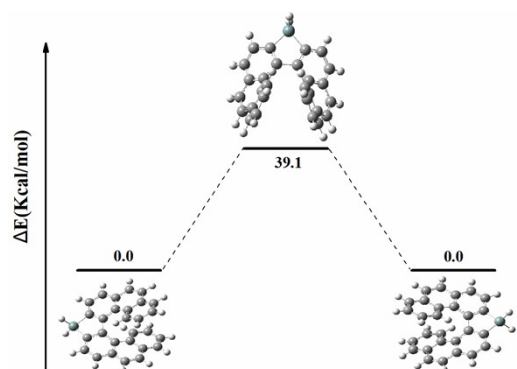

**[7]H-Si**

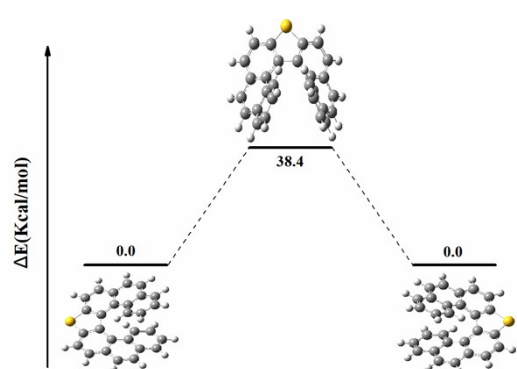

**[7]H-S**

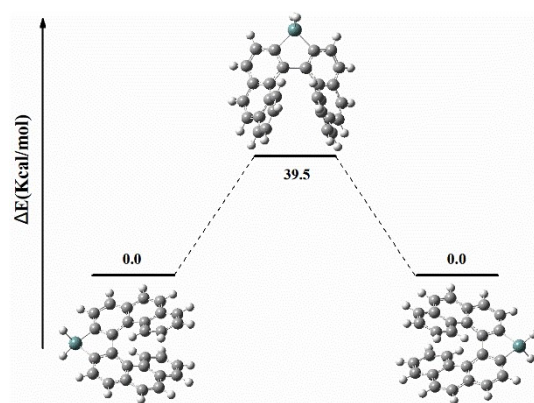

**[7]H-Ge**

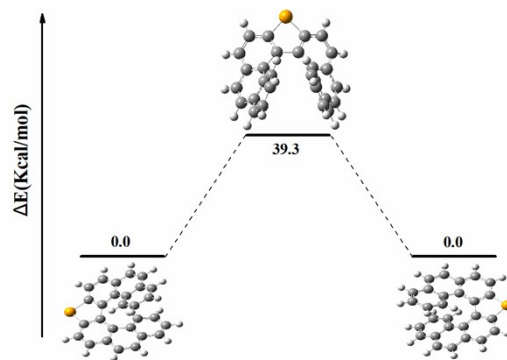

**[7]H-Se**

**Figure S13.** Energy profiles and transition states of [7]helicene and its derivatives. The barriers are in kcal/mol.
